1

2 **Analysis of the role of N-linked glycosylation in cell-surface**  
3 **expression, function and binding properties of SARS-CoV-2**  
4 **receptor ACE2**

5 Raymond Rowland,<sup>a</sup> Alberto Brandariz-Nuñez <sup>a#</sup>

6 <sup>a</sup>Department of Pathobiology, College of Veterinary Medicine, University of  
7 Illinois at Urbana-Champaign, Urbana, Illinois, USA

8

9 Running Head: N-glycosylation regulates membrane localization of ACE2

10 #Address correspondence to Alberto Brandariz-Nuñez, Brandari@illinois.edu

11

12 **Abstract**

13 Human angiotensin I-converting enzyme 2 (hACE2) is a type-I transmembrane  
14 glycoprotein that serves as the major cell entry receptor for SARS-CoV and  
15 SARS-CoV-2. The viral spike (S) protein is required for attachment to ACE2  
16 and subsequent virus-host cell membrane fusion. Previous work has  
17 demonstrated the presence of N-linked glycans in ACE2. N-glycosylation is  
18 implicated in many biological activities, including protein folding, protein activity,  
19 and cell surface expression of biomolecules. However, the contribution of N-  
20 glycosylation to ACE2 function is poorly understood. Here, we examined the  
21 role of N-glycosylation in the activity and localization of two species with  
22 different susceptibility to SARS-CoV-2 infection, porcine ACE2 (pACE2) and  
23 hACE2. The elimination of N-glycosylation by tunicamycin (TM) treatment or  
24 mutagenesis, showed that N-glycosylation is critical for the proper cell surface

25 expression of ACE2 but not for its carboxypeptidase activity. Furthermore,  
26 nonglycosylable ACE2 localized predominantly in the endoplasmic reticulum  
27 (ER) and not at the cell surface. Our data also revealed that binding of SARS-  
28 CoV and SARS-CoV-2 S protein to porcine or human ACE2 was not affected  
29 by deglycosylation of ACE2 or S proteins, suggesting that N-glycosylation plays  
30 no role in the interaction between SARS coronaviruses and the ACE2 receptor.  
31 Impairment of hACE2 N-glycosylation decreased cell to cell fusion mediated by  
32 SARS-CoV S protein but not SARS-CoV-2 S protein. Finally, we found that  
33 hACE2 N-glycosylation is required for an efficient viral entry of SARS-  
34 CoV/SARS-CoV-2 S pseudotyped viruses, which could be the result of low cell  
35 surface expression of the deglycosylated ACE2 receptor.

36

### 37 **Importance**

38 Elucidating the role of glycosylation in the virus-receptor interaction is important  
39 for the development of approaches that disrupt infection. In this study, we show  
40 that deglycosylation of both ACE2 and S had a minimal effect on the Spike-  
41 ACE2 interaction. In addition, we found that removal of N-glycans of ACE2  
42 impaired its ability to support an efficient transduction of SARS-CoV and SARS-  
43 CoV-2 S pseudotyped viruses. Our data suggest that the role of deglycosylation  
44 of ACE2 on reducing infection is likely due to a reduced expression of the viral  
45 receptor on the cell surface. These findings offer insight into the glycan  
46 structure and function of ACE2, and potentially suggest that future antiviral  
47 therapies against coronaviruses and other coronavirus-related illnesses  
48 involving inhibition of ACE2 recruitment to the cell membrane could be  
49 developed.

## 50 **Introduction:**

51 Severe acute respiratory syndrome coronavirus-2 (SARS-CoV-2) is a highly  
52 transmissible betacoronavirus that emerged in 2019 and is responsible for the  
53 current pandemic (1-7). Outcomes of human infection range from  
54 asymptomatic infection to severe clinical disease (8, 9). Infection is frequently  
55 associated with severe acute respiratory syndrome (SARS) but may also trigger  
56 other responses leading to multiorgan failure and death (5-7, 10-12). Several  
57 vaccines against SARS-CoV-2, approved for, emergency use, are being  
58 administered to the global population. For now, vaccines are highly effective  
59 and are the most effective strategy for controlling the disease. Concerns about  
60 vaccine escape variants and the broad tropism of the virus requires the  
61 continued pursuit of a broad range of antiviral strategies (13-15).

62 SARS-Cov-2 infection begins with the binding of the virus spike (S)  
63 protein to the cell surface receptor, ACE2, which results in fusion of the viral  
64 and cell membranes, and viral entry (4, 16-19). Other cell surface molecules,  
65 such as heparin sulfate, may also participate in infection (20). ACE2 also serves  
66 as a receptor for SARS-CoV, identified and isolated in 2002 (21). The S  
67 protein contains 22 N-glycosylation sites, which play important roles in immune  
68 evasion, protein conformation, and cell tropism (17-19, 22-24). One of the  
69 unique properties of the SARS-CoV-2 S protein is the presence of a furin-  
70 specific cleavage site located between the S1 and S2 subunits, which may  
71 assist in viral entry (25-27). In addition, other host enzymes including  
72 TMPRSS2 (transmembrane protease, serine 2) might contribute to viral entry  
73 of the virus (16, 25-28).

74 Human ACE2 (hACE2) is a type-I transmembrane glycoprotein that  
75 catalyzes the hydrolysis of angiotensin II (a vasoconstrictor peptide) into  
76 angiotensin (1–7) (29). hACE2 is composed of extracellular, transmembrane,  
77 and cytosolic domains (30, 31). The receptor contains 7 N-linked glycosylation  
78 sites, at amino acid residues 53, 90, 103, 322, 432, 546 and 690 (Fig. 1A) (30,  
79 32-36). The sugar residues were confirmed by glycosidase treatment and by  
80 glycomic and glycoproteomic analysis (32-36). The presence of a O-  
81 glycosylation site at T730 was also reported (34). One function that has been  
82 proposed for the N-linked glycans is a direct modulation of Spike-hACE2  
83 binding (34-36). In particular, the glycans of hACE2 at N90, N322 and N546 are  
84 all reported to interact with the SARS-CoV-2 S protein (35, 36). Recent studies  
85 evaluated the contribution of hACE2 N-glycosylation in the interaction with  
86 SARS-CoV-2 viral S protein (37, 38). The structures of the sugars on the  
87 hACE2 receptor were modified genetically or enzymatically, generating  
88 different hACE2 glycoforms (37, 38). They concluded that S binding with ACE2  
89 is slightly influenced by the N-linked glycans present in the hACE2 receptor and  
90 that the hACE2 glycans play no role in viral entry (37, 38). However, the N-  
91 linked sugars present on the Spike protein were critical for the virus to enter the  
92 host cells (38, 39).

93 ACE2 from different species possess different glycosylation patterns (34),  
94 which may influence the tropism of the virus. For instance, the mouse ACE2  
95 receptor, which is not susceptible to SARS-CoV-2 infection (4, 40), only has  
96 three N-glycosylation sites that share similarities with hACE2 (34). On the other  
97 hand, the porcine ACE2 (pACE2) receptor has eight potential N-glycosylation  
98 sites and shares four similar sites with hACE2 (Fig. 1A). In vitro studies found



99 that expression of pACE2 receptor on non-permissive cells to SARS-CoV-2  
100 infection allows viral entry and infection (4, 40). In addition, there is growing  
101 evidence that pigs might be susceptible to SARS-CoV (41) or SARS-CoV-2  
102 infection (42). Although, the results of these studies contradict previous reports  
103 indicating swine are not susceptible to SARS-CoV (43) or SARS-CoV-2  
104 infections (44, 45). As part of this study, we compare the binding properties of  
105 hACE and pACE in response to deglycosylation.

106 It has been extensively proposed that N-glycosylation is involved in  
107 many important biological processes, including protein folding, enzymatic  
108 activity, trafficking and cell surface expression of proteins (46, 47). However,  
109 the importance of N-glycosylation for ACE2 function has not been previously  
110 investigated. This work explores the role of N-glycosylation of both pACE2 and  
111 hACE2 receptors in the cell surface expression, activity and in regulating direct  
112 Spike-ACE2 interactions. The results show that the total loss of glycans inhibits  
113 the proper cell surface expression of ACE2, but does not interfere with  
114 enzymatic activity. In addition, the complete removal of glycans from both S  
115 and ACE2 proteins does not inhibit their binding. Interestingly, hACE2 N-  
116 glycosylation decreased cell to cell fusion mediated by SARS-CoV S protein  
117 but not SARS-CoV-2 S protein-induced membrane fusion. Finally, we found  
118 that the presence of N-glycans in hACE2 is required for an efficient viral entry  
119 of SARS-CoV/SARS-CoV-2 S pseudotyped viruses, which can be attributed to  
120 the fact that deglycosylated ACE2 is less available in the cell surface.

121

122

123

124 **Results:**

125 **N-glycosylation inhibition induces accumulation of ACE2 in the ER**

126 To understand the role of glycosylation in ACE2 function, we incorporated two  
127 N-glycosylation inhibitors tunicamycin (TM) and kifunensine (KIF). TM inhibits  
128 the first step of N-glycan biosynthesis, which results in the complete absence  
129 of glycan residues (48), while KIF is an inhibitor of ER-located mannosidase-I  
130 and complex N-glycosylation, resulting in the production of glycoproteins  
131 lacking the characteristic terminal sugar found on mature N-glycans (48, 49).  
132 Following transfection of 293T cells with a hACE2-expressing plasmid and  
133 treatment with TM, immunoblot analysis of whole cell lysates was performed.  
134 Treatment of the cells with TM resulted in a faster electrophoretic mobility shift  
135 for the hACE2 band showing the loss of N-linked glycosylation (Fig. 1B, lane  
136 3). Digestion of untreated cell lysates with PNGase F, which cleaves all N-  
137 glycans, resulted in a hACE2 band similar in size to that of TM-treated cells,  
138 confirming the deglycosylation of hACE2 (Fig. 1B, lane 4). Similar results were  
139 obtained when we performed the same experiments with pACE2 (Fig. 1C).  
140 Next, to further confirm that TM treatment and PNGase F digestion produced  
141 a N-glycosylation-deficient hACE2, we generated a hACE2 variant, in which all  
142 the N present in the consensus N-glycosylation sites were replaced by Q (for  
143 clarity, this new mutant is herein referred to as hACE2\*). As expected,  
144 expression of hACE2\* in 293T cells resulted in detection of a band with a similar  
145 molecular weight to that of TM-treated lysates or samples digested with  
146 PNGase F (Fig. 1D; lane 5). Interestingly, TM treatment showed reduced levels  
147 of ACE2 (Fig. 1B, 1C and 1D). The effect of TM was mimicked by hACE2\*

148 construct, which lacked glycans. Together, these data suggests that core N-  
149 glycosylation is important for ACE2 biosynthesis.

150 KIF treatment of transfected cells did not have significant impact in the  
151 electrophoretic mobility of either hACE2 or pACE2 and generated bands with a  
152 slightly shorter molecular weight (Fig. 1E and 1F; lane 3). However, the digestion  
153 of KIF-treated cell lysates with Endo H, which cleaves only the high-mannose  
154 and hybrid branches of N-glycans, resulted in bands at a lower molecular  
155 weight compared to untreated controls (Fig. 1E and 1F; lane 5). In addition,  
156 untreated cell lysates digested with Endo H generated two different bands for  
157 both ACE2 proteins, one band with a similar molecular weight as the control  
158 and a faint band with the same size as the KIF-treated cells (Fig. 1E and 1F;  
159 lane 4). These last results confirmed a small presence of high mannose/hybrid  
160 type glycans on both ACE2 receptors. Taken together, these results suggest  
161 that ACE2 contains complex-form and high-mannose N-linked structures,  
162 which are consistent with previous studies (32-35).

163 Since blocking of N-glycosylation might cause accumulation of  
164 unglycosylated proteins in the ER (46, 47), we tested the effect of N-  
165 glycosylation inhibition on the subcellular localization of ACE2. For this  
166 experiment, we studied the localization of ACE2 by immunofluorescence in the  
167 presence of TM or KIF. As shown in Fig. 2A, TM treatment induced  
168 colocalization of human and porcine ACE2 proteins with a ER marker, PDI (50,  
169 51). In the absence of TM, ACE2 proteins were localized mostly in the cell  
170 surface and showed no accumulation in the ER (Fig. 2A). Similarly, incubation  
171 of the cells with the mannosidase-I inhibitor, KIF, had little or no effect on the  
172 cell-surface localization of ACE2 (Fig. 2B). These observations indicate that the

173 mannosidase I activity, which is required for processing newly formed high-  
174 mannose glycoproteins in the ER into mature glycoproteins containing highly  
175 hybrid complex-type glycans (46), is not necessary for the cell-surface  
176 expression of ACE2. Quantification of the colocalization between the ACE2  
177 proteins and the ER marker verified the accumulation of the ACE2 in the ER  
178 after TM treatment (Fig. 2C).

179 To further confirm that the N-glycosylation-deficient ACE2 proteins were  
180 arrested in the ER, a Golgi marker, Golgin-97, was used. As shown in Fig. S1,  
181 TM treatment did not show an overlap with the Golgi-marker, confirming that  
182 the N-glycosylation-defective ACE2 proteins were trapped in the ER unable to  
183 progress down the normal secretory pathway through the Golgi apparatus.  
184 Collectively, our data suggest that N-glycosylation is critical for cell surface  
185 expression of ACE2.

186

### 187 **N-glycosylation-deficient hACE2 variants accumulate in the ER**

188 Since TM is nonspecific, affecting the glycosylation of all proteins, we repeated  
189 the same localization experiments by constructing ACE2 proteins lacking  
190 different glycosylation sites. Mutants were constructed by replacing N with a Q.  
191 Following transfection of 293T cells with the hACE2 mutant constructs,  
192 immunoblot analysis on whole cell lysates was performed. The highest  
193 molecular weight band was found in the wild-type protein. As the number of N-  
194 glycosylation sites decreased, the migration size was reduced (Fig. 3A). Next,  
195 we investigated the cellular distribution of the N-glycosylation-deficient mutants  
196 expressed in 293T cells by immunofluorescence. The results revealed that the  
197 triple and quadruple mutants were expressed mostly on the cell surface similar

198 to the wild-type hACE2 (Fig. 3B and 3C). Colocalization of the quadruple  
199 mutant and ER was also observed in some cells (Fig. 3B and 3C), whereas  
200 the other mutants, in which most or all of the N-glycosylation sites were  
201 removed, strongly overlapped with the ER (Fig. 3B and 3C). These results  
202 indicate that the N-glycosylation-deficient hACE2 variants failed to exit in the  
203 ER and in turn were not expressed at the cell surface. To further verify that N-  
204 glycosylation-defective ACE2 variants accumulated in the ER, we next tested  
205 whether those variants colocalized with the ER chaperone, calnexin (52). ACE2  
206 nonglycosylated forms and calnexin colocalized (Fig. 3D), confirming that N-  
207 glycosylation-deficient ACE2 variants accumulated in the ER. Finally, to further  
208 confirm that hACE2\* is retained in ER, we analyzed its colocalization with  
209 Golgin-97. As shown in Fig. S1, hACE2\* did not overlap with the Golgi-marker,  
210 confirming that the N-glycosylation-deficient hACE2 variant was retained in ER  
211 and unable to progress down the normal secretory pathway through the Golgi  
212 apparatus. Altogether, our results indicate that at least a partial N-glycosylation  
213 is necessary for the proper cell surface expression of hACE2.

214

### 215 **N-glycosylation is critical for the proper cell surface expression of ACE2**

216 The previous immunofluorescence experiments suggested that cell surface  
217 expression of the ACE2 nonglycosylated variants, generated either by TM  
218 treatment (Fig. 2) or by mutagenesis (Fig. 3), was reduced compared with wild-  
219 type ACE2. The abundance of nonglycosylated ACE2 or wild-type ACE2 on cell  
220 surface was analyzed by cell surface biotinylation. As shown in Fig. 4A and 4B,  
221 the surface density of both hACE2 and pACE2 proteins generated following TM  
222 treatment was significantly reduced compared with untreated cells. Similarly,

223 the presence of hACE2\* mutant on the cell surface was decreased compared  
224 with wild type hACE2 (Fig. 4C). Additionally, KIF treatment did not reduce the  
225 cell surface expression of both hACE2 and pACE2 (Fig. 4D), which is consistent  
226 with the immunofluorescence data shown above (Fig. 2C). In agreement with  
227 the findings shown in the previous section, these data demonstrate that ACE2  
228 N-deglycosylation results in a pronounced decrease of cell surface expression.

229

### 230 **N-glycosylation is not necessary for the carboxypeptidase activity of** 231 **ACE2**

232 To test the impact of N-glycosylation in the folding of ACE2 receptor, we  
233 determined the carboxypeptidase activity of both nonglycosylated hACE2 and  
234 pACE2, generated by either TM treatment of cells or by mutagenesis. To  
235 directly analyze the carboxypeptidase activity of ACE2 proteins, we tested the  
236 ability of immunoprecipitated ACE2 variants (Fig. 5A and 5B) to hydrolyze a  
237 synthetic peptide substrate. The ACE2 variants described in the western blot to  
238 the right of each graph were incubated with a fluorophore-labeled substrate.  
239 As shown in Fig. 5A and 5B, the constructs lacking glycosylation did not lose  
240 carboxypeptidase activity when compared to wild type. These results show that  
241 N-glycosylation is not required for ACE2 protease activity and suggest that the  
242 N-glycosylation-deficient ACE2 variants are in a native conformational state.

243

### 244 **N-glycosylation inhibition of ACE2 receptor and/or SARS-CoV-2/SARS-** 245 **CoV-2 S protein does not disrupt S-ACE2 association**

246 The ACE2 receptor is extensively glycosylated bearing high-mannose, hybrid,  
247 or complex carbohydrates distributed among its 7 N-glycosylation sites (Fig.

248 1A) (32-35). Several functions have been proposed for these N-glycans  
249 including a direct modulation of Spike-ACE2 binding (34-36). Recent studies  
250 investigated the role of ACE2 N-glycosylation in the interaction with SARS-  
251 CoV-2 S protein (37, 38). To this end, they generated different hACE2  
252 glycoforms. Specifically, the N-linked sugars displayed by hACE2 were  
253 modified genetically or enzymatically (37, 38). However, the effect of a whole  
254 blocking of hACE2 N-glycosylation, by removing all the N-glycans from ACE2,  
255 on the binding to S protein was not investigated (37, 38). To assess the  
256 importance of N-glycosylation on ACE2-S binding, we analyzed the  
257 biochemical ability of N-glycosylation-deficient ACE2 variants containing a  
258 FLAG tag to interact with untagged S protein. For this purpose, we first  
259 independently transfected cells with plasmids expressing either hACE2 or S.  
260 Cells were lysed, and cell lysates containing FLAG-tagged hACE2 and  
261 untagged S protein were mixed. After precipitation with anti-FLAG beads, the  
262 eluted proteins by the FLAG peptide were separated by SDS-PAGE gels and  
263 analyzed by Western blotting using antibodies directed against the FLAG tag  
264 and the S protein. The SARS-CoV-2 S protein was efficiently coprecipitated by  
265 the anti-FLAG antibody, which is consistent with previous reports that  
266 demonstrated that hACE2 interacts with SARS-CoV-2 S protein (Fig. 6A) (4,  
267 16-18, 26, 53-56). Similar results were obtained when we used pACE2 as the  
268 bait to pulldown the S protein (Fig. 6A). This result in agreement with the  
269 observation that expression of pACE2 on non-permissive cells to SARS-CoV-  
270 2 infection allows viral entry and infection (4, 40). Colocalization experiments  
271 confirmed the interaction of both hACE2 and pACE2 with SARS-CoV-2 S  
272 protein (Fig. 6B). Next, we tested the ability of N-glycosylation-deficient ACE2

273 variants, generated either by TM treatment or by mutagenesis, to bind S by  
274 performing similar methods. As shown in Fig. 7A and 7B, the nonglycosylated  
275 variants of both hACE2 and pACE2, generated after TM treatment, were able  
276 to interact with S protein. Similarly, the N-glycosylation-defective ACE2 mutant  
277 showed association with S protein (Fig. 7C). These results indicated that N-  
278 glycosylation is not required for the ability of ACE2 to bind SARS-CoV-2 S  
279 protein. Interestingly, a nonglycosylated variant of S generated after TM  
280 treatment, was able to interact with ACE2, suggesting that N-glycosylation of  
281 SARS-CoV-2 S protein is not required for its capacity to bind ACE2 receptor  
282 (Fig. 7A and 7B). It is important to point out that the expression of the  
283 nonglycosylated S variant was only detected in the pull-down assay when using  
284 ACE2 as bait (Fig. 7A and 7B), suggesting that the blocking of N-glycosylation  
285 might affect the stability or expression of the S protein. To confirm that the TM  
286 treatment generated a N-glycosylation-defective S variant, untreated S-  
287 containing lysates were digested with PNGase F. As expected, both treatments  
288 produced S protein bands of similar size (Fig. 7D). Consistently, N-  
289 deglycosylation of both ACE2 and S protein by mutagenesis or TM treatment,  
290 respectively, did not disrupt their interaction (Fig. 7E). Additional colocalization  
291 data further confirmed the association between the N-glycosylation-deficient  
292 ACE2 variants and the Spike protein (Fig. 7F and 7G). Finally, we explored the  
293 ability of SARS-CoV S protein to bind nonglycosylated ACE2 variants. As  
294 shown in Fig. S2A and S2D, N-glycosylation-defective ACE2 variants from  
295 human and pig were capable to bind SARS-CoV S protein, which agrees with  
296 a previous work that showed that modifications of the N-linked glycan structure  
297 of hACE2 did not affect to its binding to the S protein (57). Colocalization results



298 confirmed the S-ACE2 association (Fig. S2B and S2F). Moreover, a  
299 nonglycosylated S variant, generated by TM treatment, was able to interact with  
300 ACE2 receptors (Fig. S2A and S2D). Similar to SARS-CoV-2 S protein, the  
301 expression of the nonglycosylated S variant was only detected in the pull-down  
302 assay when using ACE2 as bait (Figure S2A and S2D), suggesting that the  
303 blocking of N-glycosylation might affect the stability or expression of the S  
304 protein. In addition, digestion of untreated S-containing lysates with PNGase  
305 F confirmed that TM treatment generated a N-glycosylation-defective S variant  
306 (Fig. S2C). Consistently, the N-deglycosylation of both ACE2 and S protein by  
307 mutagenesis or TM treatment of cells, respectively, did not disrupt their  
308 interaction (Fig. S2E). Overall, these findings indicated that N-glycosylation is  
309 not required for the ability of ACE2 to bind either SARS-CoV S or SARS-CoV-  
310 2 S protein.

311

### 312 **hACE2 N-glycosylation impairment decreases cell to cell fusion mediated** 313 **by SARS-CoV S protein but not SARS-CoV-2 S protein**

314 Both furin or type II membrane serine proteases (TMPRSS)-mediated cleavage  
315 can trigger the fusogenic ability of both SARS-CoV-2 S and SARS-CoV S  
316 proteins, inducing receptor-dependent syncytial formation (25-27, 58-62). To  
317 investigate the effect of ACE2 N-glycosylation of either SARS-CoV-2 or SARS-  
318 CoV S glycoprotein-driven cell-to-cell fusion, we performed a widely adopted  
319 S-mediated cell-cell fusion assay (59, 63). The assay is based on the  
320 expression of GFP in one of the effector cells. Fusion is evident by the  
321 movement of GFP into the non-GFP expressing partner cell resulting in the  
322 formation of multinucleated large green cells. For this experiment, we used

323 293T cells that expressed either SARS-CoV-2 or SARS-CoV S protein and  
324 GFP (293T/GFP/Spike) as the effector cells, and 293T cells expressing either  
325 wild-type ACE2 or a N-glycosylation-defective ACE2 variant as the target cells  
326 ((293T/hACE2) (293T/hACE2\*)). For the SARS-CoV S-mediated cell–cell  
327 fusion assay, effector cells were detached with trypsin and overlaid on target  
328 cells co-expressing ACE2 variants and TMPRSS2 to facilitate the fusion  
329 mediated by the S protein. In the case of SARS-CoV-2 S protein-triggered  
330 membrane fusion assay, cells were detached with 1 mM EDTA and overlaid on  
331 target cells. Syncytia formation was assessed by fluorescence microscopy.  
332 After effector cells and target cells were cocultured for 24h, the formation of big  
333 syncytia was observed in wild-type hACE2-expressing target cells when either  
334 of SARS-CoV or SARS-CoV2 S protein was used (Fig. 8A and 8B). No fusion  
335 was observed for GFP-expressing effector cells without S-expression or target  
336 cells without ACE2-expression (Fig. 8A and 8B), which confirms that S-receptor  
337 engagement is required for the S-mediated viral fusion. Next, we analyzed the  
338 fusogenic capacity of SARS-CoV-2/SARS-CoV S protein in target cells  
339 expressing the N-glycosylation-deficient hACE2 mutant. As shown in Fig. 8A  
340 and 8B, SARS-CoV S protein lost the ability to mediate cell–cell fusion when  
341 hACE2 N-glycosylation was impaired. This finding is consistent with the fact  
342 that the N-glycosylation-defective hACE2 variant is less expressed in the cell  
343 surface compared to the wild-type hACE2, which indirectly would reduce the  
344 fusogenic capacity of the S protein. On the contrary, SARS-CoV-2 S protein did  
345 not lose the ability to mediate the cell–cell fusion under the same conditions.  
346 No statistically significant differences were observed in syncytia formation  
347 comparing nonglycosylated with wild-type hACE2 (Fig. 8A and 8B). Thus, in

348 contrast to SARS-CoV S protein, SARS-CoV-2 S protein was much more  
349 effective in mediating cell-cell fusion into target cells expressing a N-  
350 glycosylation-deficient hACE2 variant. Overall, these findings suggested that  
351 the SARS-CoV-2 S protein has higher capacity to mediate membrane fusion  
352 compared to the SARS-CoV S protein. This is in agreement with previous  
353 reports showing that the increased ability to mediate cell-cell fusion of the  
354 SARS-CoV-2 S protein is likely due to the presence of a furin cleavage site in  
355 its sequence (27, 59, 63).

356

## 357 **Effect of hACE2 N-glycosylation inhibition on the SARS-CoV/SARS-CoV-** 358 **2 viral entry**

359 Based on our previous findings demonstrating that N-glycosylation is required  
360 for a proper ACE2 cell surface expression, we hypothesized that viral entry of  
361 SARS-CoV-2 might be reduced in cells expressing a nonglycosylated variant of  
362 hACE2. To test this possibility, we investigated the impact of hACE2 N-  
363 glycosylation on viral entry. For this purpose, we determined whether GFP-  
364 expressing SARS-CoV-2 S pseudotyped viruses were able to transduce 293T  
365 cells expressing wild type hACE2 or a N-glycosylation-deficient ACE2 variant  
366 (hACE2\*). The hACE2 proteins were transiently expressed (Fig. 9A) and then  
367 the ability of hACE2 receptors to allow SARS-CoV-2 S pseudovirions entry was  
368 tested. VSV-G pseudotyped viruses were used as a positive control. As  
369 expected, all transfected cells were effectively transduced by VSV-G  
370 pseudotyped viruses (Fig. 9B and 9C). Compared to cells transfected with  
371 empty plasmid (mock control), that was not susceptible to viral entry of SARS-  
372 CoV-2 S pseudotyped viruses, transduction of wild type hACE2-expressing

373 cells with SARS-CoV-2 pseudoviral particles showed more GFP-positive cells.  
374 This observation is consistent with previous findings that demonstrated that  
375 hACE2 is the receptor of SARS-CoV-2 (4, 16, 17, 64). In contrast, the viral entry  
376 of SARS-CoV-2 S pseudotyped viruses in N-nonglycosylable ACE2-expressing  
377 cells was reduced compared to hACE2-expressing cells (Fig. 9B and 9C),  
378 suggesting that ACE2 needs to be N-glycosylated to support viral entry.  
379 Similarly, viral entry of SARS-CoV S pseudotyped viruses was also reduced in  
380 cells expressing a N-glycosylation-deficient variant (Fig. 9B and 9C). These  
381 results indicated that hACE2 N-glycosylation is required to allow an efficient  
382 viral entry of both SARS-CoV-2 and SARS-CoV-2, which is in agreement with  
383 our previous results that showed that N-glycosylation is a prerequisite for the  
384 proper cell surface expression of hACE2.

385

## 386 **Discussion**

387 Overall, the work presented here analyzes the importance of ACE2 N-linked  
388 glycosylation in cell membrane expression and protease activity as well as in  
389 various roles of ACE2, including binding to SARS-CoV-2/SARS-CoV-2 S  
390 protein, cell–cell fusion mediated by SARS-CoV/SARS-CoV-2 S protein and  
391 viral entry of SARS-CoV-2/SARS-CoV-2 S pseudotyped viruses. From these  
392 studies, we have learned the following: (1) N-glycosylation is a major  
393 determinant for the biosynthesis and the proper cell surface expression of  
394 ACE2, (2) ACE2 N-glycosylation is not required for its carboxipeptidase activity,  
395 (3) Association of SARS-CoV-2/SARS-CoV-2 S protein with ACE2 is not  
396 disrupted by N-glycosylation inhibition of ACE2 receptors or the viral proteins,  
397 (4), Impairment of hACE2 N-glycosylation affects cell–cell fusion mediated by

398 SARS-CoV S protein but not the membrane fusion induced by SARS-CoV-2 S  
399 protein, and (5), hACE2 N-glycosylation is indirectly required for an efficient  
400 viral entry of the SARS-CoV/SARS-CoV-2 S pseudotyped viruses.

401 In agreement with previous studies (32-36), we verified, by digestion  
402 with glycosidases and by treatment with inhibitors that interfere at different  
403 stages of N-glycosylation biosynthesis, that hACE2 is N-linked glycosylated.  
404 Digestion with Endo H confirmed a small presence of high mannose/hybrid  
405 type glycans at hACE2 receptor. This finding is consistent with previous  
406 glycomic and glycoproteomic analysis that found that complex-type glycans  
407 were much more abundant than high mannose/hybrid type glycans across all  
408 N-glycosylation sites of hACE2 (34, 35). By using the same methods, we also  
409 found that pACE2, that showed four similar N-glycosylation sites with human  
410 (Fig. 1A), displays a similar N-glycosylation pattern as its homologous hACE2.  
411 These results suggest the presence of N-linked glycans in ACE2 receptors  
412 across different related species.

413 A large body of evidence describes important roles for N-glycosylation  
414 in protein stability and in cell surface expression of biomolecules (46, 47, 65-  
415 68). Our results demonstrate that the complete deglycosylation of ACE2 by site-  
416 directed mutagenesis or TM treatment results in a significant decrease in cell  
417 surface expression of the ACE2 receptor (Fig. 2 and 3). Reduced surface  
418 expression is the result of reduced protein expression (Fig. 1 and Fig. 4) along  
419 with increased retention in the ER (Fig. 2 and 3). As shown in Fig. 3B the loss  
420 of five N-glycosylation sites, represented by the  
421 N90Q/N322Q/N546Q/N53Q/N103Q is sufficient to retain ACE-2 in the ER.  
422 Colocalization studies showed that deglycosylated ACE2 was predominantly

423 localized to the ER and not in the Golgi, suggesting that N-glycosylation is  
424 important for the biosynthetic processing from the ER. In the absence of N-  
425 glycans, Golgi processing is prevented, blocking the secretory pathway through  
426 the Golgi. Incubation of cells with KIF resulted in the loss of complex  
427 glycosylation of ACE2 but did not result in the retention in the ER. This result  
428 shows that complex N-glycosylation is not required for surface expression of  
429 ACE2 (Fig. 2 and 4), allowing the surface expression of ACE2 lacking complex  
430 sugars. This finding is consistent with a previous work that showed that  
431 inhibition of ER glucosidases with iminosugars did not affect ACE2 expression  
432 on the cell surface (57). These results show that the reduction of viral entry  
433 observed for the SARS-CoV/SARS-CoV-2 S pseudotyped viruses is likely the  
434 result of reduced expression of deglycosylated ACE2 on the cell surface.

435 Another potential role for N-glycosylation is the effect on the interaction  
436 between ACE-2 and the S protein. There are several examples of the  
437 requirement for N-glycosylation in formation of protein-protein interactions. For  
438 instance, N-glycosylation of the vasopressin V1a receptor is needed for optimal  
439 receptor-ligand binding (69) and N-glycosylation of P2Y12 receptor is  
440 necessary to trigger a proper downstream Gi-mediated signaling (70). In  
441 contrast, N-glycosylation is not required for the receptor functions of  
442 angiotensin II type-1 receptor (71), histamine H2 receptor (72) and the orphan  
443 G protein-coupled receptor Gpr176 (68). The interaction between the heavily  
444 glycosylated ACE2 and glycosylated S protein predicts a role for N-  
445 glycosylation in forming the receptor-S interaction. The published crystal  
446 structure and molecular modeling of hACE2, indicate that N90, N322 and N546-  
447 linked glycans interact with the SARS-Cov2 S protein (19, 35, 36, 73). Other

448 studies show that the absence of N-linked glycans in hACE2 has a little or no  
449 effect on S binding (37, 38). Here we show that the complete removal of N-  
450 glycans by mutagenesis or TM treatment did not disrupt the interaction of both  
451 ACE2 receptors (pig and human) with SARS-CoV or SARS-CoV-2 S proteins.  
452 Moreover, removal of all N-glycans on ACE-2 and S proteins did not prevent  
453 co-precipitation, suggesting that glycans do not play a critical role in forming  
454 the interaction between ACE2 and S protein. In contrast, it has been reported  
455 for other viruses an important role of sialic acid present in the N-glycans on  
456 ligand-receptor interactions, including coronavirus like the Middle-East  
457 Respiratory Syndrome virus/MERS (74), parovirus (75) and influenza (76, 77).

458 In agreement with previous studies, we found that removal of N-glycans  
459 from hACE2 decreased the fusogenic ability of the viral S protein from SARS-  
460 CoV (Fig. 8A; (57)). One likely explanation for reduced fusogenic activity is the  
461 decreased surface expression of deglycosylated ACE2. Under the same  
462 experimental conditions, SARS-CoV-2 S protein did not lose the ability to  
463 mediate cell-to-cell membrane fusion. This observation is consistent with  
464 previous reports that showed that the higher ability to mediate cell-cell fusion of  
465 the SARS-CoV-2 S protein is likely due to the presence of a furin cleavage site  
466 in its sequence (27, 59, 63). In agreement with this notion, insertion of the S1/S2  
467 furin-cleavage site significantly potentiated the capacity of SARS-CoV S  
468 protein to mediate cell–cell fusion but did not affect virion entry (78). In general,  
469 the S1/S2 furin-recognition site is missing in most of  $\beta$ -B coronaviruses, and  
470 their S proteins are uncleaved in normal conditions. For instance, in the case  
471 of SARS-CoV, that mainly uses the endosomal membrane fusion pathway to  
472 enter the host cell, its S protein is cleaved by endosomal cathepsin L and



473 activated (79-81). The specific role of the S1/S2 cleavage site in the viral life-  
474 cycle of SARS-CoV-2 remains to be further investigated. A recent study  
475 showed that furin promotes both SARS-CoV-2 infectivity and cell-cell spread  
476 but it is not absolutely essential for SARS-CoV-2 infection and replication  
477 occurs in its absence, suggesting that furin-targeting drugs may reduce but not  
478 abolish viral spread (27). In line with these observations, a possible role of the  
479 furin cleavage site in reducing SARS-CoV-2 sensitivity to innate immune  
480 restriction was also proposed (82). Even though the role of the furin cleavage  
481 site in the SARS-CoV-2 life cycle remains unclear, in this study we showed  
482 that it might function to overcome the low cell-surface expression of  
483 deglycosylated ACE2.

484 Our findings indicated that hACE2 N-glycosylation is required to allow  
485 an efficient viral entry of both SARS-CoV and SARS-CoV-2 virus, which might  
486 be attributed to the fact that N-glycosylation is necessary for the proper cell-  
487 surface expression of hACE2. The fact that fewer non-glycosylated ACE2 is  
488 available in the cell surface would imply less virus-receptor binding and  
489 therefore a decrease in the viral infection. Another possible explanation is that  
490 the removal of the N-glycans induced a misfolding of the hACE2 glycoprotein.  
491 However, our binding S-ACE2 experiments and protease activity studies  
492 suggested that N-glycosylation-deficient ACE2 variants are properly folded  
493 (Fig. 5, Fig.7 and Fig.S2). Alteration of N-linked glycans in ACE2 blocked its  
494 ability to support the transduction of SARS-CoV and human coronavirus NL63  
495 (HCoV-NL63) S pseudotyped viruses by disruption of the viral S protein-  
496 induced membrane fusion (57). It remains to be determined whether the



497 reduced fusogenic activity is due to the aberrant glycan structure of ACE2 or to  
498 misfolding of the glycoprotein.

499 By analyzing the effect of blocking complex N-glycans formation of  
500 hACE2 receptor, it has been proposed that ACE2 glycans may not regulate  
501 viral entry of SARS-CoV-2 (38). In contrast to a full inhibition of N-glycosylation  
502 biosynthesis, our data showed that inhibition of complex N-glycosylation (by  
503 using KIF) did not alter the cell surface expression of ACE2. Moreover, a whole  
504 N-glycosylation depletion of the ACE2 receptor did not disrupt the S-ACE2  
505 interaction, which would explain why the ACE2 N-glycans do not have a role in  
506 the viral entry of SARS-CoV-2. These observations support that idea that the  
507 reduction of the viral entry in cells expressing a non-glycosylated ACE2 is  
508 probably due to the lack of available cell-surface ACE2. However, the N-linked  
509 sugars present on the S protein were critical for the virus to enter the host cells  
510 since inhibition of complex N-glycan biosynthesis enhanced S protein  
511 proteolysis, suggesting that N-glycosylation might play a role regulating SARS-  
512 CoV-2 S protein stability (38, 39). In agreement with these findings, we  
513 observed that the expression of a nonglycosylated S variant was very low and  
514 only was detected by Western blotting when it was coprecipitated with ACE2,  
515 suggesting that the blocking of N-glycosylation might affect the stability or  
516 expression of the S protein.

517 Our data showed that the levels of wild-type hACE2 protein were higher  
518 than the N-glycosylation-deficient ACE2 mutant, suggesting that N-  
519 glycosylation inhibition might affect the stability or expression of the ACE2  
520 receptor. Since N-glycosylation plays an important role in protein stability by  
521 protection against proteolysis (83-85), we investigated whether hACE2 protein

522 stability is affected by the presence of its N-linked glycan motifs. Cycloheximide  
523 (CHX), an inhibitor of protein synthesis, was used to analyze the turnover rates  
524 of the hACE2 variants. We found that after up to 10h of drug treatment, hACE2  
525 and hACE\* levels did not change, suggesting tha N-glycosylation is not  
526 implicated in hACE2 stability and is not absolutely required for correct folding  
527 (Fig. S3). At this moment, our findings indicated that N-glycosylation is required  
528 for an efficient protein expression of ACE2. However, the exact role of N-linked  
529 glycosylation in the protein expression remains to be determined. Similarly, it  
530 was shown that the expression levels of other receptors such as rhodopsin (86),  
531  $\beta$ 2-adrenergic receptor (87), angiotensin II type-1 receptor (71) and the orphan  
532 G protein-coupled receptor Gpr176 (68) were all reduced by the depletion of  
533 N-glycosylation. However, this does not necessarily hold true for other  
534 receptors, for instance, it was shown that the expression levels of the orphan  
535 GPCR Gpr6 (88),  $\alpha$ 1-adrenergic receptor (89), M2 muscarinic receptor (90),  
536 histamine H2 receptor (72), vasopressin V2 receptor (91), PTH receptor (92),  
537 LH-RH receptor (93), and oxytocin receptor (94) were not significantly modified  
538 by blocking of N-glycosylation.

539 In conclusion, our data reveal an important role of the N-linked  
540 glycosylation in cell membrane expression of ACE2 but not in its protease  
541 activity. Furthermore, our study demonstrates that N-deglycosylation of both  
542 ACE2 and S viral protein does not have a negative impact in their association.  
543 However, our findings also showed that depletion of ACE2 N-glycosylation  
544 recuded the viral entry of SARS-CoV and SARS-CoV-2, which is probably due  
545 to the lack of available cell-surface ACE2. These findings provide additional  
546 information regarding the glycan structure and function of ACE2, and potentially

547 suggest that future antiviral therapies against coronaviruses involving inhibition  
548 of ACE2 trafficking to the cell surface could be developed.

549

## 550 **Materials and Methods**

### 551 **Plasmids**

552 The plasmids, pCDNA3.1-hACE2-FLAG and pCDNA3.1-pACE2-FLAG, which  
553 express human ACE2 (GenBank accession number NM\_021804.3) and pig  
554 ACE2 (GenBank accession number NM\_001123070.1) fused to a FLAG  
555 epitope, respectively, were purchased from GenScript, as well as the  
556 pCDNA3.1-TMPRSS2-FLAG expressing TMPRSS2 (GenBank accession  
557 number NM\_005656.4) fused to a FLAG epitope. pCDNA3.1-SARS2-Spike  
558 expressing full-length Spike (S) protein from SARS-CoV-2 (GenBank accession  
559 number QHD43416.1) was purchased from Addgene. Expression plasmid  
560 encoding S protein from SARS-CoV (GenBank accession number  
561 AAP13567.1) was purchased from SinoBiological. pCDNA3.1-SARS2-Spike  
562  $\Delta$ 19 expressing a truncated SARS-CoV2 spike protein with the last 19 amino  
563 acids removed, was generated by using the Q5 Site-Directed Mutagenesis Kit  
564 (New England Biolabs), the plasmid pCDNA3.1-SARS2-Spike and the following  
565 mutagenic oligonucleotide primers: the sense primer was: 5'-  
566 CAGCTGCTGCTAGTTCGATGAGGACG-3' and the antisense primer was 5'-  
567 CCGCAGGAGCAGCAGCCC-3', following the manufacturer's  
568 recommendations.

569 The pCDNA3.1-hACE2-FLAG plasmid and a Q5 Site-Directed  
570 Mutagenesis Kit (New England Biolabs) were used according to the  
571 manufacturer's specifications to generate recombinant plasmids that

572 expressed hACE2 N-glycosylation mutants, by substituting the N-linking site  
573 with Q. The following mutagenic oligonucleotide primers were used: for the  
574 production of mutation N53Q, the sense primer was 5'-  
575 TTATAACACCCAAATTACTGAAGAGAATG-3' and the antisense primer was  
576 5'-TTCCAAGAAGCAAGTGAAC-3'; for the production of mutation N103Q, the  
577 sense primer was 5'- TCTTCAGCAACAAGGGTCTTCAGTGC-3' and the  
578 antisense primer was 5'-GCCTGCAGCTGAAGCTTG-3'; for the production of  
579 mutation N90Q, the sense primer was 5'-  
580 AGAAATTCAGCAGCTCACAGTCAAG-3' and the antisense primer was 5'-  
581 TGTAGTGGATACATTTGG-3'; for the production of mutation N322Q, the  
582 sense primer was 5'-TGGTCTTCCTCAGATGACTCAAG-3' and the antisense  
583 primer was 5'-ACAGATACAAAGAACTTCTC-3'; for the production of mutation  
584 N546Q, the sense primer was 5'-TGACATCTCACAGTCTACAGAAGCTG-3'  
585 and the antisense primer was 5'-CATTTGTGCAGAGGGCCT-3'; for the  
586 production of mutation N432Q, the sense primer was 5'-  
587 TCAAGAAGACCAAGAAACAGAAATAAACTTC-3' and the antisense primer  
588 was 5'-AAATCGGGTGACAGAAGAC-3'; for the production of mutation N690Q  
589 the sense primer was 5'-TGCACCTAAACAAGTGTCTGATATC-3' and the  
590 antisense primer was 5'-GTGACAAAGAAATTAAGGAG-3'. The correctness  
591 of the constructs was confirmed by sequencing and by Western blot analysis of  
592 the expressed proteins. The hACE2\* is a mutant in which the Asn (N) for all  
593 consensus N-glycosylation sites was replaced with a Gln (Q).

594

595

596

597 **Cells, antibodies and reagents**

598 HEK 293T cells (ATCC CRL-3216 from American Type Culture Collection,  
599 Rockville, MD) and HEK 293T Lenti-X (Clontech/Takara Bio) were cultured at  
600 37°C in 5% CO<sub>2</sub> in Dulbecco's modified Eagle's medium (DMEM; Life  
601 Technologies) supplemented with 10% fetal bovine serum (FBS; Gibco), 2 mM  
602 L-glutamine (Life Technologies), and antibiotics (100 U/ml penicillin and 100  
603 µg/ml streptomycin; Life Technologies).

604 The following reagents and their commercial sources were used:  
605 tunicamycin and cycloheximide (Sigma); Kifunensine (Tocris Bioscience);  
606 ACE2 activity kit (no. K897, BioVision); anti-FLAG-agarose beads (Sigma); and  
607 3X FLAG Peptide (Sigma). The following antibodies were purchased from  
608 Thermo Fischer: SARS-CoV/SARS-CoV-2 Spike protein S2 monoclonal  
609 antibody (1A9), PDI mouse antibody (Clone: RL90), Alexa 594- and Alexa 488-  
610 conjugated antibodies against mouse and rabbit IgG, respectively. The  
611 monoclonal anti-FLAG M2 antibody was purchased from Sigma. The anti-  
612 GAPDH (D4C6R) monoclonal antibody, the Golgin-97 (D8P2K) rabbit  
613 monoclonal antibody, the Calnexin (C5C9) rabbit monoclonal antibody and the  
614 FLAG-tag (D6W5B) rabbit monoclonal antibody were from Cell Signaling.

615

616 **Transfection and immunofluorescence (IF) microscopy**

617 Transfections of cell monolayers were done with the TransIT®-LT1  
618 Transfection Reagent (Mirus) according to the manufacturer's instructions  
619 (Mirus). Transfected cells were incubated at 37°C for 24-48 h unless otherwise  
620 stated. For indirect IF microscopy, cell monolayers grown on coverslips were  
621 transfected as indicated in the figure legends. At the indicated times, the

622 monolayers were fixed with 4% paraformaldehyde. Fixed cells were  
623 permeabilized with 0.5% Triton X-100 in phosphate-buffered saline (PBS) and  
624 then blocked in PBS containing 2% bovine serum albumin. After incubation  
625 with primary antibodies for 1 h at RT or overnight at 4°C, the cells were  
626 incubated for 1 h with secondary antibodies and DAPI (4',6'-diamidino-2-  
627 phenylindole). Images were obtained with a Nikon A1R laser scanning confocal  
628 microscope. The images were processed with NIS-elements software (Nikon).  
629

### 630 **Quantitative analysis of fluorescent images**

631 The fluorescent intensity of individual cells was measured by NIS-element  
632 software. The channel for each specific fluorescent signal was analyzed and  
633 the regions of interest (individual cells) were selected. The colocalization  
634 analysis was performed by using the colocalization analysis tool. In order to  
635 determine whether two fluorescent signals colocalized with each other, the  
636 Pearson's correlation coefficient (PCC) values of individual cells were  
637 measured. Higher PCC values denoted higher levels of colocalization between  
638 the two fluorescent signals (See Fig. 2 and 3). Statistical analysis of the data  
639 was performed by using Student's t test.  $p < 0.05$  was considered to be  
640 statistically significant.

641

### 642 **Western blot**

643 Cellular proteins were extracted with a whole-cell extract buffer (50 mM Tris  
644 [pH 7.5], 150 mM NaCl, 0.5% Triton X-100, 10% glycerol, 1 mM EDTA,  
645 protease inhibitor cocktail [Sigma]). Cells lysates were resolved on 4–12% Bis-  
646 Tris NuPAGE gels (Invitrogen) and transferred to nitrocellulose membranes

647 using a Trans-Blot Turbo Transfer System (Biorad). Protein bands were  
648 detected with specific antibodies using SuperSignal West Femto Maximum  
649 Sensitivity Substrate (Thermo Fisher) and viewed on a FluorChem R system  
650 (Proteinsimple).

651

## 652 **Immunoprecipitation assay**

653 Human 293T cells were independently transfected with plasmids encoding  
654 FLAG-tagged mutant and wild-type hACE2 proteins, FLAG-tagged pACE2  
655 protein and untagged SARS-CoV/SARS-CoV-2 S protein. For some  
656 experiments, cells were treated with tunicamycin (1 $\mu$ g/ml) for 16h before  
657 harvesting. After 24 h, the cells expressing each ACE2 variant or S protein were  
658 lysed in 1 ml of whole-cell extract buffer. Lysates were centrifuged at 14,000  
659 rpm for 30 min at 4°C. Post-spin lysates were then precleared using protein A-  
660 agarose (Sigma) for 1 h at 4°C; a small aliquot of each of these lysates was  
661 stored as an input sample. Precleared lysates containing the differently tagged  
662 or untagged proteins were mixed in a 1/1 ratio and incubated with anti-FLAG-  
663 agarose beads (Sigma) overnight at 4°C to precipitate the FLAG-tagged  
664 proteins. Beads containing the immunoprecipitate were washed four times in  
665 whole-cell extract buffer. Subsequently, immune complexes were eluted using  
666 200  $\mu$ g of 3X FLAG Peptide /ml in whole-cell extract buffer without Triton X-  
667 100. The eluted samples were separated by SDS-PAGE and analyzed by  
668 Western blotting using anti-FLAG M2 monoclonal antibody or SARS-  
669 CoV/SARS-CoV-2 Spike protein S2 monoclonal antibody.

670

671

## 672 **Cell surface biotinylation assay**

673 Human 293T cells were transiently transfected with plasmids encoding FLAG-  
674 tagged hACE2 variants or FLAG-tagged pACE2 protein for 24h. Where  
675 indicated cells were treated with tunicamycin (1µg/ml) for 16h before  
676 harvesting. The cell surface biotinylation assay was performed using the Pierce  
677 Cell Surface Biotinylation and Isolation kit (Thermo Fisher) following the  
678 manufacturer's recommendations. Briefly, the cell surface of 293T cells was  
679 biotinylated using EZ-Link sulfo-NHS-SS-biotin. Cells were lysed with whole-  
680 cell extract buffer and biotinylated proteins were recovered with Neutravidin  
681 beads. Input lysates and pulldown proteins were analyzed by western blotting  
682 with the anti-FLAG M2 monoclonal antibody (Sigma) and anti-GAPDH  
683 monoclonal antibody (Cell Signaling) as described above.

684

## 685 **ACE2 Activity Assay**

686 Human 293T cells were transiently transfected with 10 µg of plasmid encoding  
687 FLAG-tagged hACE2 variants or FLAG-tagged pACE2 protein. Where  
688 indicated after transfection, cells were treated with tunicamycin (1µg/ml) for 16h  
689 before harvesting. At 24 h post-transfection, cells were lysed with whole-cell  
690 extract buffer and the FLAG tagged proteins were immunoprecipitated  
691 overnight at 4°C using anti-FLAG-agarose beads (Sigma), as described above.  
692 The immunoprecipitated extracts were processed in triplicates using the kit  
693 reagents and recommendations. The carboxypeptidase activity of the ACE2  
694 variants was measured as fluorescence (Ex/Em = 320/420 nm) in kinetic mode  
695 using a Spectramax-ID5 plate reader (molecular devices) for 30 min to 2 h. A  
696 positive control was included by the kit. Immunoprecipitated extracts were also



697 analyzed by western blot with the anti-FLAG M2 monoclonal antibody (Sigma)  
698 as described above.

699

### 700 **Flow Cytometry Analysis**

701 Flow cytometry was performed to quantify the GFP-positive cells after SARS-  
702 CoV-2 or SARS-CoV S pseudotyped virus infection. Monolayers of 293T cells  
703 expressing hACE2 variants were infected for 48-72 h at 37°C with either SARS-  
704 CoV-2 or SARS-CoV S pseudotyped virus. Infection was performed in the  
705 presence of 8 µg/ml polybrene. HEK 293T cells transfected with an empty  
706 plasmid were used as the background negative control. After 48-72 hours post  
707 infection, cells were gently trypsinized (trypsin-EDTA). The percentage of GFP-  
708 positive cells was determined by flow cytometry (Cytex Aurora). 293T cells were  
709 initially analyzed by light scattering, where FSC (Forward Scatter) is a measure  
710 of size and SSC (side scatter) an indication of granularity and internal  
711 complexity. In all cases, a gate was applied on the bulk of the cells (95%), which  
712 excluded large aggregates. For each sample, 100,000-50,000 single cells were  
713 analyzed. To detect GFP, the samples were excited with a 488-nm laser  
714 coupled to an emission filter allowing the 515 nm wavelengths to go through.  
715 The data was processed with FlowJov10 software. All experiments were done  
716 in triplicate and repeated at least three times. Statistical analysis of the data  
717 was performed by using Student's t test.  $p < 0.05$  was considered to be  
718 statistically significant.

719

720

721

722 **SARS-CoV-2 S pseudovirions production and viral entry**

723 SARS-CoV-2 or SARS-CoV Spike-protein pseudovirions were generated by  
724 replacing the vesicular stomatitis virus (VSV-G) envelope protein of 3rd  
725 generation lentivirus with a mutant S protein possessing a deletion of 19 amino  
726 acid residues at the C-terminus. To generate these viruses, Lenti-X 293 T cells  
727 (Takara Bio) grown in 10 cm dish were transiently transfected with the following  
728 plasmids: 5 µg of pLenti-GFP (Cell Biolabs), 6 µg of psPAX2 and 0.9 µg of  
729 pCMV-VSVG (Cell Biolabs), or 0.9 µg of pCDNA3.1-SARS2-SpikeΔ19, or 0.9  
730 µg of pCDNA3.1-SARS-Spike using the TransIT®-LT1 Transfection Reagent  
731 (Mirus) according to the manufacturer's instructions. After overnight incubation,  
732 the medium was replaced with complete medium (DMEM + 10% FBS). At 48-  
733 72h after transfection, the supernatant was harvested, centrifuged at 800 × g  
734 for 5 min to remove cell debris and filtered through a 0.45 µm pore size PVDF  
735 syringe filter (Millipore), aliquoted and stored at -80°C until use.

736 In order to transduce cells with pseudovirions, virus was added either to  
737 mock transfected 293T or ACE2-transfected 293T cell lines at 24 hr post-  
738 transfection. Infection was performed in the presence of 8 µg/ml polybrene.  
739 After overnight incubation, cells were washed and returned to culture for 48 h  
740 and then subjected to flow cytometry analysis. GFP fluorescence was  
741 monitored daily. All flow cytometry and microscopy data presented in this study  
742 correspond to the 48-72 hr after transduction.

743

744

745

746

747 **Cell–cell fusion assay**

748 HEK-293T cells expressing mutant or wild-type hACE2 variants were used as  
749 target cells. In some cases, the target cells were also transiently expressing  
750 type II membrane serine protease TMPRSS2. To prepare effector cells  
751 expressing S protein from either SARS-CoV or SARS-CoV-2, HEK-293T cells  
752 were co-transfected with plasmids encoding S glycoprotein and eGFP. For  
753 SARS-CoV S protein-mediated cell fusion, cells were lifted with trypsin (0.25%)  
754 at 24 h post transfection and overlaid on a monolayer of target cells at a ratio  
755 of approximately 1:1. For SARS-CoV-2 S protein-mediated cell fusion, cells  
756 were detached with 1 mM EDTA and overlaid on target cells at a similar ratio  
757 as above. After 24 h incubation, five fields were randomly selected in each well  
758 to count the number of nuclei in fused and unfused cells. Images of syncytia  
759 were obtained with a Nikon A1R laser scanning confocal microscope. All  
760 experiments were performed in triplicate and repeated at least three times.  
761 Statistical analysis of the data was performed by using Student's t test.  $p < 0.05$   
762 was considered to be statistically significant.

763

764 **Treatment with N-glycosylation processing inhibitors and glycosidases.**

765 Tunicamycin (TM) and Kifunensine (KIF) at a concentration of 1  $\mu\text{g/ml}$  and 5  
766  $\mu\text{g/ml}$ , respectively, were used to inhibit N-glycosylation in transfected HEK-  
767 293T cells. Prior to treatment, cell lysates were mixed with glycoprotein  
768 denaturing buffer (New England Biolabs) and incubated at 100 °C for 10 min.  
769 To remove high-mannose oligosaccharides, cell lysates were treated with  
770 endoglycosidase H (Endo H) (New England BioLabs) for 1 h at 37°C. Peptide-  
771 N-glycosidase F (PNGase F) (New England BioLabs) was used to remove all

772 N-linked oligosaccharides for 1 h at 37°C. Digested proteins were analyzed by  
773 Western blotting with anti-M2 FLAG monoclonal antibody (Sigma).

774

## 775 **References**

- 776 1. Organization WH. 2020. World Health Organization coronavirus disease  
777 2019 (COVID-19) situation report.
- 778 2. Zhu N, Zhang D, Wang W, Li X, Yang B, Song J, Zhao X, Huang B, Shi W, Lu R.  
779 2020. A novel coronavirus from patients with pneumonia in China, 2019.  
780 *New England journal of medicine*.
- 781 3. Wu F, Zhao S, Yu B, Chen Y-M, Wang W, Song Z-G, Hu Y, Tao Z-W, Tian J-H,  
782 Pei Y-Y. 2020. A new coronavirus associated with human respiratory  
783 disease in China. *Nature* 579:265-269.
- 784 4. Zhou P, Yang X-L, Wang X-G, Hu B, Zhang L, Zhang W, Si H-R, Zhu Y, Li B,  
785 Huang C-L. 2020. A pneumonia outbreak associated with a new  
786 coronavirus of probable bat origin. *nature* 579:270-273.
- 787 5. Chen G, Wu D, Guo W, Cao Y, Huang D, Wang H, Wang T, Zhang X, Chen H,  
788 Yu H. 2020. Clinical and immunological features of severe and moderate  
789 coronavirus disease 2019. *The Journal of clinical investigation* 130:2620-  
790 2629.
- 791 6. Huang C, Wang Y, Li X, Ren L, Zhao J, Hu Y, Zhang L, Fan G, Xu J, Gu X. 2020.  
792 Clinical features of patients infected with 2019 novel coronavirus in  
793 Wuhan, China. *The lancet* 395:497-506.
- 794 7. Wang D, Hu B, Hu C, Zhu F, Liu X, Zhang J, Wang B, Xiang H, Cheng Z, Xiong  
795 Y. 2020. Clinical characteristics of 138 hospitalized patients with 2019

- 796 novel coronavirus–infected pneumonia in Wuhan, China. *Jama* 323:1061-  
797 1069.
- 798 8. Kwok KO, Huang Y, Tsoi MTF, Tang A, Wong SYS, Wei WI, Hui DSC. 2021.  
799 Epidemiology, clinical spectrum, viral kinetics and impact of COVID - 19 in  
800 the Asia - Pacific region. *Respirology*.
- 801 9. Organization WH. 2020. Clinical management of COVID-19: interim  
802 guidance, 27 May 2020. World Health Organization,
- 803 10. Lillicrap D. 2020. Disseminated intravascular coagulation in patients with  
804 2019 - nCoV pneumonia. *Journal of Thrombosis and Haemostasis* 18:786.
- 805 11. Song P, Li W, Xie J, Hou Y, You C. 2020. Cytokine storm induced by SARS-  
806 CoV-2. *Clinica chimica acta*.
- 807 12. Zhao Z, Wei Y, Tao C. 2020. An enlightening role for cytokine storm in  
808 coronavirus infection. *Clinical Immunology*:108615.
- 809 13. Teijaro JR, Farber DL. 2021. COVID-19 vaccines: modes of immune  
810 activation and future challenges. *Nature Reviews Immunology*:1-3.
- 811 14. Kyriakidis NC, López-Cortés A, González EV, Grimaldos AB, Prado EO. 2021.  
812 SARS-CoV-2 vaccines strategies: a comprehensive review of phase 3  
813 candidates. *npj Vaccines* 6:1-17.
- 814 15. Indari O, Jakhmola S, ELANGO VAN M, Jha HC. 2021. An update on antiviral  
815 therapy against SARS-CoV-2: How far have we come? *Frontiers in*  
816 *Pharmacology* 12:133.
- 817 16. Hoffmann M, Kleine-Weber H, Schroeder S, Krüger N, Herrler T, Erichsen S,  
818 Schiergens TS, Herrler G, Wu N-H, Nitsche A. 2020. SARS-CoV-2 cell entry

- 819 depends on ACE2 and TMPRSS2 and is blocked by a clinically proven  
820 protease inhibitor. *cell* 181:271-280. e8.
- 821 17. Letko M, Marzi A, Munster V. 2020. Functional assessment of cell entry and  
822 receptor usage for SARS-CoV-2 and other lineage B betacoronaviruses.  
823 *Nature microbiology* 5:562-569.
- 824 18. Walls AC, Park Y-J, Tortorici MA, Wall A, McGuire AT, Velesler D. 2020.  
825 Structure, function, and antigenicity of the SARS-CoV-2 spike glycoprotein.  
826 *Cell* 181:281-292. e6.
- 827 19. Lan J, Ge J, Yu J, Shan S, Zhou H, Fan S, Zhang Q, Shi X, Wang Q, Zhang L.  
828 2020. Structure of the SARS-CoV-2 spike receptor-binding domain bound  
829 to the ACE2 receptor. *Nature* 581:215-220.
- 830 20. Clausen TM, Sandoval DR, Spliid CB, Pihl J, Perrett HR, Painter CD,  
831 Narayanan A, Majowicz SA, Kwong EM, McVicar RN. 2020. SARS-CoV-2  
832 infection depends on cellular heparan sulfate and ACE2. *Cell* 183:1043-  
833 1057. e15.
- 834 21. Stadler K, Masignani V, Eickmann M, Becker S, Abrignani S, Klenk H-D,  
835 Rappuoli R. 2003. SARS—beginning to understand a new virus. *Nature*  
836 *Reviews Microbiology* 1:209-218.
- 837 22. Ou X, Liu Y, Lei X, Li P, Mi D, Ren L, Guo L, Guo R, Chen T, Hu J. 2020.  
838 Characterization of spike glycoprotein of SARS-CoV-2 on virus entry and its  
839 immune cross-reactivity with SARS-CoV. *Nature communications* 11:1-12.
- 840 23. Watanabe Y, Allen JD, Wrapp D, McLellan JS, Crispin M. 2020. Site-specific  
841 glycan analysis of the SARS-CoV-2 spike. *Science* 369:330-333.
- 842 24. Casalino L, Gaieb Z, Goldsmith JA, Hjorth CK, Dommer AC, Harbison AM,  
843 Fogarty CA, Barros EP, Taylor BC, McLellan JS. 2020. Beyond shielding: the

- 844 roles of glycans in the SARS-CoV-2 spike protein. ACS Central Science  
845 6:1722-1734.
- 846 25. Hoffmann M, Kleine-Weber H, Pöhlmann S. 2020. A multibasic cleavage site  
847 in the spike protein of SARS-CoV-2 is essential for infection of human lung  
848 cells. *Molecular cell* 78:779-784. e5.
- 849 26. Shang J, Wan Y, Luo C, Ye G, Geng Q, Auerbach A, Li F. 2020. Cell entry  
850 mechanisms of SARS-CoV-2. *Proceedings of the National Academy of*  
851 *Sciences* 117:11727-11734.
- 852 27. Papa G, Mallery DL, Albecka A, Welch LG, Cattin-Ortolá J, Luptak J, Paul D,  
853 McMahon HT, Goodfellow IG, Carter A. 2021. Furin cleavage of SARS-CoV-  
854 2 Spike promotes but is not essential for infection and cell-cell fusion. *PLoS*  
855 *Pathogens* 17:e1009246.
- 856 28. Matsuyama S, Ujike M, Morikawa S, Tashiro M, Taguchi F. 2005. Protease-  
857 mediated enhancement of severe acute respiratory syndrome coronavirus  
858 infection. *Proceedings of the National Academy of Sciences* 102:12543-  
859 12547.
- 860 29. Wang W, McKinnie SM, Farhan M, Paul M, McDonald T, McLean B, Llorens-  
861 Cortes C, Hazra S, Murray AG, Vederas JC. 2016. Angiotensin-converting  
862 enzyme 2 metabolizes and partially inactivates pyr-apelin-13 and apelin-  
863 17: physiological effects in the cardiovascular system. *Hypertension*  
864 68:365-377.
- 865 30. Jiang F, Yang J, Zhang Y, Dong M, Wang S, Zhang Q, Liu FF, Zhang K, Zhang  
866 C. 2014. Angiotensin-converting enzyme 2 and angiotensin 1-7: novel  
867 therapeutic targets. *Nat Rev Cardiol* 11:413-26.

- 868 31. Chamsi-Pasha MA, Shao Z, Tang WW. 2014. Angiotensin-converting  
869 enzyme 2 as a therapeutic target for heart failure. *Current heart failure*  
870 *reports* 11:58-63.
- 871 32. Tipnis SR, Hooper NM, Hyde R, Karran E, Christie G, Turner AJ. 2000. A  
872 human homolog of angiotensin-converting enzyme: cloning and functional  
873 expression as a captopril-insensitive carboxypeptidase. *Journal of*  
874 *Biological Chemistry* 275:33238-33243.
- 875 33. Li W, Moore MJ, Vasilieva N, Sui J, Wong SK, Berne MA, Somasundaran M,  
876 Sullivan JL, Luzuriaga K, Greenough TC. 2003. Angiotensin-converting  
877 enzyme 2 is a functional receptor for the SARS coronavirus. *Nature*  
878 426:450-454.
- 879 34. Shajahan A, Archer-Hartmann SA, Supekar NT, Gleinich AS, Heiss C, Azadi  
880 P. 2020. Comprehensive characterization of N-and O-glycosylation of  
881 SARS-CoV-2 human receptor angiotensin converting enzyme 2. *bioRxiv*.
- 882 35. Zhao P, Praissman JL, Grant OC, Cai Y, Xiao T, Rosenbalm KE, Aoki K,  
883 Kellman BP, Bridger R, Barouch DH. 2020. Virus-receptor interactions of  
884 glycosylated SARS-CoV-2 spike and human ACE2 receptor. *Cell host &*  
885 *microbe* 28:586-601. e6.
- 886 36. Mehdipour AR, Hummer G. 2020. Dual nature of human ACE2 glycosylation  
887 in binding to SARS-CoV-2 spike. *BioRxiv*.
- 888 37. Allen JD, Watanabe Y, Chawla H, Newby ML, Crispin M. 2021. Subtle  
889 influence of ACE2 glycan processing on SARS-CoV-2 recognition. *Journal of*  
890 *molecular biology* 433:166762.



- 891 38. Yang Q, Hughes TA, Kelkar A, Yu X, Cheng K, Park S, Huang W-C, Lovell JF,  
892 Neelamegham S. 2020. Inhibition of SARS-CoV-2 viral entry upon blocking  
893 N-and O-glycan elaboration. *Elife* 9:e61552.
- 894 39. Azad T, Singaravelu R, Taha Z, Jamieson TR, Boulton S, Crupi MJ, Martin NT,  
895 Brown EE, Poutou J, Ghahremani M. 2021. Nanoluciferase  
896 complementation-based bioreporter reveals the importance of N-linked  
897 glycosylation of SARS-CoV-2 S for viral entry. *Molecular Therapy*.
- 898 40. Conceicao C, Thakur N, Human S, Kelly JT, Logan L, Bialy D, Bhat S,  
899 Stevenson-Leggett P, Zagrajek AK, Hollinghurst P. 2020. The SARS-CoV-2  
900 Spike protein has a broad tropism for mammalian ACE2 proteins. *PLoS*  
901 *biology* 18:e3001016.
- 902 41. Chen W, Yan M, Yang L, Ding B, He B, Wang Y, Liu X, Liu C, Zhu H, You B.  
903 2005. SARS-associated coronavirus transmitted from human to pig.  
904 *Emerging infectious diseases* 11:446.
- 905 42. Pickering BS, Smith G, Pinette MM, Embury-Hyatt C, Moffat E, Marszal P,  
906 Lewis CE. 2021. Susceptibility of Domestic Swine to Experimental Infection  
907 with Severe Acute Respiratory Syndrome Coronavirus 2. *Emerging*  
908 *infectious diseases* 27:104.
- 909 43. Weingartl HM, Copps J, Drebot MA, Marszal P, Smith G, Gren J, Andonova M,  
910 Pasick J, Kitching P, Czub M. 2004. Susceptibility of pigs and chickens to  
911 SARS coronavirus. *Emerging infectious diseases* 10:179.
- 912 44. Shi J, Wen Z, Zhong G, Yang H, Wang C, Huang B, Liu R, He X, Shuai L, Sun Z.  
913 2020. Susceptibility of ferrets, cats, dogs, and other domesticated animals  
914 to SARS–coronavirus 2. *Science* 368:1016-1020.

- 915 45. Schlottau K, Rissmann M, Graaf A, Schön J, Sehl J, Wylezich C, Höper D,  
916 Mettenleiter TC, Balkema-Buschmann A, Harder T. 2020. SARS-CoV-2 in  
917 fruit bats, ferrets, pigs, and chickens: an experimental transmission study.  
918 *The Lancet Microbe* 1:e218-e225.
- 919 46. Bieberich E. 2014. Synthesis, processing, and function of N-glycans in N-  
920 glycoproteins, p 47-70, *Glycobiology of the nervous system*. Springer.
- 921 47. Aebi M. 2013. N-linked protein glycosylation in the ER. *Biochimica et*  
922 *Biophysica Acta (BBA)-Molecular Cell Research* 1833:2430-2437.
- 923 48. Esko JD, Bertozzi C, Schnaar RL. 2017. Chemical tools for inhibiting  
924 glycosylation.
- 925 49. Elbein AD, Tropea JE, Mitchell M, Kaushal GP. 1990. Kifunensine, a potent  
926 inhibitor of the glycoprotein processing mannosidase I. *Journal of*  
927 *Biological Chemistry* 265:15599-15605.
- 928 50. Alenquer M, Vale-Costa S, Etibor TA, Ferreira F, Sousa AL, Amorim MJ.  
929 2019. Influenza A virus ribonucleoproteins form liquid organelles at  
930 endoplasmic reticulum exit sites. *Nature communications* 10:1-19.
- 931 51. Yen J-B, Wei L-H, Chen L-W, Chen L-Y, Hung C-H, Wang S-S, Chang P-J. 2018.  
932 Subcellular localization and functional characterization of GII. 4 norovirus-  
933 encoded NTPase. *Journal of virology* 92.
- 934 52. Lei X, Dong X, Ma R, Wang W, Xiao X, Tian Z, Wang C, Wang Y, Li L, Ren L.  
935 2020. Activation and evasion of type I interferon responses by SARS-CoV-  
936 2. *Nature communications* 11:1-12.
- 937 53. Yan R, Zhang Y, Li Y, Xia L, Guo Y, Zhou Q. 2020. Structural basis for the  
938 recognition of SARS-CoV-2 by full-length human ACE2. *Science* 367:1444-  
939 1448.

- 940 54. Wan Y, Shang J, Graham R, Baric RS, Li F. 2020. Receptor recognition by the  
941 novel coronavirus from Wuhan: an analysis based on decade-long  
942 structural studies of SARS coronavirus. *Journal of virology* 94.
- 943 55. Wrapp D, Wang N, Corbett KS, Goldsmith JA, Hsieh C-L, Abiona O, Graham  
944 BS, McLellan JS. 2020. Cryo-EM structure of the 2019-nCoV spike in the  
945 prefusion conformation. *Science* 367:1260-1263.
- 946 56. Chan KK, Dorosky D, Sharma P, Abbasi SA, Dye JM, Kranz DM, Herbert AS,  
947 Procko E. 2020. Engineering human ACE2 to optimize binding to the spike  
948 protein of SARS coronavirus 2. *Science* 369:1261-1265.
- 949 57. Zhao X, Guo F, Comunale MA, Mehta A, Sehgal M, Jain P, Cuconati A, Lin H,  
950 Block TM, Chang J. 2015. Inhibition of endoplasmic reticulum-resident  
951 glucosidases impairs severe acute respiratory syndrome coronavirus and  
952 human coronavirus NL63 spike protein-mediated entry by altering the  
953 glycan processing of angiotensin I-converting enzyme 2. *Antimicrobial  
954 agents and chemotherapy* 59:206-216.
- 955 58. Coutard B, Valle C, de Lamballerie X, Canard B, Seidah N, Decroly E. 2020.  
956 The spike glycoprotein of the new coronavirus 2019-nCoV contains a furin-  
957 like cleavage site absent in CoV of the same clade. *Antiviral research*  
958 176:104742.
- 959 59. Xia S, Lan Q, Su S, Wang X, Xu W, Liu Z, Zhu Y, Wang Q, Lu L, Jiang S. 2020.  
960 The role of furin cleavage site in SARS-CoV-2 spike protein-mediated  
961 membrane fusion in the presence or absence of trypsin. *Signal  
962 transduction and targeted therapy* 5:1-3.
- 963 60. Bestle D, Heindl MR, Limburg H, Pilgram O, Moulton H, Stein DA, Harges K,  
964 Eickmann M, Dolnik O, Rohde C. 2020. TMPRSS2 and furin are both

- 965 essential for proteolytic activation of SARS-CoV-2 in human airway cells.  
966 Life science alliance 3.
- 967 61. Nguyen HT, Zhang S, Wang Q, Anang S, Wang J, Ding H, Kappes JC, Sodroski  
968 J. 2021. Spike glycoprotein and host cell determinants of SARS-CoV-2 entry  
969 and cytopathic effects. *Journal of Virology* 95.
- 970 62. Hörnich BF, Großkopf AK, Schlagowski S, Tenbusch M, Kleine-Weber H,  
971 Neipel F, Stahl-Hennig C, Hahn AS. 2021. SARS-CoV-2 and SARS-CoV Spike-  
972 Mediated Cell-Cell Fusion Differ in Their Requirements for Receptor  
973 Expression and Proteolytic Activation. *Journal of Virology* 95.
- 974 63. Xia S, Liu M, Wang C, Xu W, Lan Q, Feng S, Qi F, Bao L, Du L, Liu S, Qin C, Sun  
975 F, Shi Z, Zhu Y, Jiang S, Lu L. 2020. Inhibition of SARS-CoV-2 (previously  
976 2019-nCoV) infection by a highly potent pan-coronavirus fusion inhibitor  
977 targeting its spike protein that harbors a high capacity to mediate  
978 membrane fusion. *Cell Res* 30:343-355.
- 979 64. Wan Y, Shang J, Graham R, Baric RS, Li F. 2020. Receptor Recognition by the  
980 Novel Coronavirus from Wuhan: an Analysis Based on Decade-Long  
981 Structural Studies of SARS Coronavirus. *J Virol* 94.
- 982 65. Weng T-Y, Chiu W-T, Liu H-S, Cheng H-C, Shen M-R, Mount DB, Chou C-Y.  
983 2013. Glycosylation regulates the function and membrane localization of  
984 KCC4. *Biochimica Et Biophysica Acta (BBA)-Molecular Cell Research*  
985 1833:1133-1146.
- 986 66. Singh R, Almutairi MM, Pacheco-Andrade R, Almiahuob MYM, Di Fulvio M.  
987 2015. Impact of hybrid and complex N-Glycans on cell surface targeting of  
988 the endogenous chloride cotransporter Slc12a2. *International journal of*  
989 *cell biology* 2015.

- 990 67. Hayashi H, Yamashita Y. 2012. Role of N-glycosylation in cell surface  
991 expression and protection against proteolysis of the intestinal anion  
992 exchanger SLC26A3. *American Journal of Physiology-Cell Physiology*  
993 302:C781-C795.
- 994 68. Wang T, Nakagawa S, Miyake T, Setsu G, Kunisue S, Goto K, Hirasawa A,  
995 Okamura H, Yamaguchi Y, Doi M. 2020. Identification and functional  
996 characterisation of N-linked glycosylation of the orphan G protein-coupled  
997 receptor Gpr176. *Scientific reports* 10:1-12.
- 998 69. Lee K-H, Ahn J-I, Yu D-H, Jeong H-S, Lee S-H, Kim K-S, Chung I-Y, Kim J-H,  
999 Lee Y-S. 2001. Effect of N-glycosylation on ligand binding affinity of rat V1a  
1000 vasopressin receptor. *Biochemical and biophysical research*  
1001 *communications* 286:707-713.
- 1002 70. Zhong X, Kriz R, Seehra J, Kumar R. 2004. N - linked glycosylation of  
1003 platelet P2Y12 ADP receptor is essential for signal transduction but not for  
1004 ligand binding or cell surface expression. *FEBS letters* 562:111-117.
- 1005 71. DESLAURIERS B, PONCE C, LOMBARD C, LARGUIER R, BONNAFOUS J-C,  
1006 MARIE J. 1999. N-glycosylation requirements for the AT1a angiotensin II  
1007 receptor delivery to the plasma membrane. *Biochemical Journal* 339:397-  
1008 405.
- 1009 72. Fukushima Y, Oka Y, Saitoh T, Katagiri H, Asano T, Matsushashi N, Takata K,  
1010 Van Breda E, Yazaki Y, Sugano K. 1995. Structural and functional analysis  
1011 of the canine histamine H2 receptor by site-directed mutagenesis: N-  
1012 glycosylation is not vital for its action. *Biochemical Journal* 310:553-558.

- 1013 73. Shang J, Ye G, Shi K, Wan Y, Luo C, Aihara H, Geng Q, Auerbach A, Li F. 2020.  
1014 Structural basis of receptor recognition by SARS-CoV-2. *Nature* 581:221-  
1015 224.
- 1016 74. Li W, Hulswit RJ, Widjaja I, Raj VS, McBride R, Peng W, Widagdo W,  
1017 Tortorici MA, Van Dieren B, Lang Y. 2017. Identification of sialic acid-  
1018 binding function for the Middle East respiratory syndrome coronavirus  
1019 spike glycoprotein. *Proceedings of the National Academy of Sciences*  
1020 114:E8508-E8517.
- 1021 75. Löfling J, Lyi SM, Parrish CR, Varki A. 2013. Canine and feline parvoviruses  
1022 preferentially recognize the non-human cell surface sialic acid N-  
1023 glycolylneuraminic acid. *Virology* 440:89-96.
- 1024 76. Stencel-Baerenwald JE, Reiss K, Reiter DM, Stehle T, Dermody TS. 2014.  
1025 The sweet spot: defining virus-sialic acid interactions. *Nature Reviews*  
1026 *Microbiology* 12:739-749.
- 1027 77. Watanabe Y, Bowden TA, Wilson IA, Crispin M. 2019. Exploitation of  
1028 glycosylation in enveloped virus pathobiology. *Biochimica et Biophysica*  
1029 *Acta (BBA)-General Subjects* 1863:1480-1497.
- 1030 78. Follis KE, York J, Nunberg JH. 2006. Furin cleavage of the SARS coronavirus  
1031 spike glycoprotein enhances cell-cell fusion but does not affect virion  
1032 entry. *Virology* 350:358-369.
- 1033 79. Belouzard S, Chu VC, Whittaker GR. 2009. Activation of the SARS  
1034 coronavirus spike protein via sequential proteolytic cleavage at two  
1035 distinct sites. *Proceedings of the National Academy of Sciences* 106:5871-  
1036 5876.

- 1037 80. Huang I-C, Bosch BJ, Li F, Li W, Lee KH, Ghiran S, Vasilieva N, Dermody TS,  
1038 Harrison SC, Dormitzer PR. 2006. SARS coronavirus, but not human  
1039 coronavirus NL63, utilizes cathepsin L to infect ACE2-expressing cells.  
1040 Journal of Biological Chemistry 281:3198-3203.
- 1041 81. Simmons G, Gosalia DN, Rennekamp AJ, Reeves JD, Diamond SL, Bates P.  
1042 2005. Inhibitors of cathepsin L prevent severe acute respiratory syndrome  
1043 coronavirus entry. Proceedings of the National Academy of Sciences  
1044 102:11876-11881.
- 1045 82. Winstone H, Lista MJ, Reid AC, Bouton C, Pickering S, Galao RP, Kerridge C,  
1046 Doores KJ, Swanson CM, Neil SJ. 2021. The Polybasic Cleavage Site in SARS-  
1047 CoV-2 Spike Modulates Viral Sensitivity to Type I Interferon and IFITM2.  
1048 Journal of Virology 95.
- 1049 83. Lee HS, Qi Y, Im W. 2015. Effects of N-glycosylation on protein  
1050 conformation and dynamics: Protein Data Bank analysis and molecular  
1051 dynamics simulation study. Scientific reports 5:1-7.
- 1052 84. Jayaprakash NG, Surolia A. 2017. Role of glycosylation in nucleating protein  
1053 folding and stability. Biochemical Journal 474:2333-2347.
- 1054 85. Tannous A, Pisoni GB, Hebert DN, Molinari M. N-linked sugar-regulated  
1055 protein folding and quality control in the ER, p 79-89. *In* (ed), Elsevier,
- 1056 86. Kaushal S, Ridge KD, Khorana HG. 1994. Structure and function in  
1057 rhodopsin: the role of asparagine-linked glycosylation. Proceedings of the  
1058 National Academy of Sciences 91:4024-4028.
- 1059 87. Rands E, Candelore M, Cheung A, Hill WS, Strader C, Dixon R. 1990.  
1060 Mutational analysis of beta-adrenergic receptor glycosylation. Journal of  
1061 Biological Chemistry 265:10759-10764.

- 1062 88. Kozielowicz P, Alomar H, Yusof S, Grafton G, Cooper AJ, Curnow SJ, Ironside  
1063 JW, Pall H, Barnes NM. 2017. N - glycosylation and expression in human  
1064 tissues of the orphan GPR61 receptor. *FEBS Open bio* 7:1982-1993.
- 1065 89. Sawutz DG, Lanier SM, Warren CD, Graham RM. 1987. Glycosylation of the  
1066 mammalian alpha 1-adrenergic receptor by complex type N-linked  
1067 oligosaccharides. *Molecular pharmacology* 32:565-571.
- 1068 90. van Koppen CJ, Nathanson NM. 1990. Site-directed mutagenesis of the m2  
1069 muscarinic acetylcholine receptor. Analysis of the role of N-glycosylation  
1070 in receptor expression and function. *Journal of Biological Chemistry*  
1071 265:20887-20892.
- 1072 91. Innamorati G, Sadeghi H, Birnbaumer M. 1996. A fully active  
1073 nonglycosylated V2 vasopressin receptor. *Molecular pharmacology*  
1074 50:467-473.
- 1075 92. Bisello A, Greenberg Z, Behar V, Rosenblatt M, Suva LJ, Chorev M. 1996. Role  
1076 of glycosylation in expression and function of the human parathyroid  
1077 hormone/parathyroid hormone-related protein receptor. *Biochemistry*  
1078 35:15890-15895.
- 1079 93. Davis DP, Rozell TG, Liu X, Segaloff DL. 1997. The six N-linked  
1080 carbohydrates of the lutropin/choriogonadotropin receptor are not  
1081 absolutely required for correct folding, cell surface expression, hormone  
1082 binding, or signal transduction. *Molecular Endocrinology* 11:550-562.
- 1083 94. Kimura T, Makino Y, Bathgate R, Ivell R, Nobunaga T, Kubota Y, Kumazawa  
1084 I, Saji F, Murata Y, Nishihara T. 1997. The role of N-terminal glycosylation  
1085 in the human oxytocin receptor. *Molecular human reproduction* 3:957-  
1086 963.



1087 **Figure legends:**

1088 **Figure 1. Effect of N-glycosylation inhibition on expression and**  
1089 **electrophoretic mobility of hACE2 and pACE2.**

1090 (A) Schematic representations of the N-glycosylation sites of ACE2 receptors  
1091 from human and pig. The hACE2 N-linked glycosylation sites, --Asn-Xaa-  
1092 Ser/Thr-(Xaa≠P)--, are indicated in red. 8 potential N-glycosylation sites in the  
1093 pACE2 are also indicated in red. The box is the transmembrane domain. (B and  
1094 C) HEK293T cells were transfected with plasmids expressing either hACE2 (B)  
1095 or pACE2 (C) and treated with TM for 16 h before harvesting, or digested with  
1096 PNGase F. ACE2 was detected with anti-FLAG antibody. (D) Western blot  
1097 analysis of hACE2 and hACE2\* expression levels in transfected HEK293T  
1098 cells. Cells were treated with TM and cell lysates digested with PNGase F. (E  
1099 and F) Western blots of hACE2 and pACE2 expression levels after KIF  
1100 treatment for 16 hours. Cell lysates were digested with EndoH and  
1101 immunoblotted with anti-FLAG antibody. In all experiments GAPDH was used  
1102 as a loading control. hACE2\* refers to N-glycosylation sites removed by  
1103 replacing Asn with Gln.

1104

1105 **Figure 2. Inhibition of cellular N-glycosylation induces co-localization of**  
1106 **ACE2 with the ER.**

1107 (A) Semiconfluent monolayers of HEK292T cells grown on coverslips were  
1108 transfected with either hACE2 or pACE2-expressing plasmids, and the cells  
1109 were incubated with TM (1 µg/ml) (+TM) dissolved in DMSO or DMSO only for  
1110 16h, fixed and stained with anti-FLAG antibody and then with Alexa 488-goat  
1111 anti-rabbit IgG (green). ER was visualized by staining cells with PDI monoclonal

1112 antibody, followed by Alexa 594-goat anti-mouse IgG (red). Nuclei were  
1113 counterstained with DAPI (blue). (B) Same as A, except cells were treated with  
1114 KIF (5  $\mu$ g/ml) (+KIF) for 16h. (C) Quantification of colocalization of ACE2  
1115 proteins and ER. Individual cells (50-60) in each sample were selected  
1116 randomly and analyzed. Pearson's correlation coefficient (PCC) values are  
1117 means  $\pm$  SD from one representative experiment performed in triplicate. \*\*\*p <  
1118 0.0005 (as determined by two-tailed Student's t-test) with respect to hACE2 and  
1119 pACE2.

1120

1121 **Figure 3. Colocalization of N-glycosylation-deficient hACE2 variants with**  
1122 **ER**

1123 (A) Expression of the N-glycosylation hACE2 mutants was analyzed by  
1124 Western blotting using anti-FLAG antibody and GAPDH as a loading control.  
1125 (B) Semiconfluent monolayers of HEK292T cells grown on coverslips were  
1126 transfected with the indicated hACE2 mutants. All cells were fixed and  
1127 immunostained as in Figure 2. (C) quantification of colocalization of ACE2  
1128 variants and ER was performed as described in Figure 2. Pearson's correlation  
1129 coefficient (PCC) values between the ACE2 staining and intracellular  
1130 endoplasmatic reticulum marker are shown on the plot. Values are means  $\pm$  SD  
1131 from one representative experiment performed in triplicate. \*\*\*p < 0.0005 (as  
1132 determined by two-tailed Student's t-test) compared with the wild-type hACE2.  
1133 (D) Semiconfluent monolayers of HEK292T cells grown on coverslips were  
1134 transfected with either hACE2, hACE2\* or pACE2-expressing plasmids, and  
1135 the cells were incubated with TM (1  $\mu$ g/ml) (+TM) dissolved in DMSO or DMSO  
1136 only for 16h, fixed and stained using anti-FLAG antibody and then with Alexa

1137 594-conjugated goat anti-mouse IgG (red). ER was visualized by staining cells  
1138 with calnexin antibody, followed by Alexa 488-conjugated goat anti-rabbit IgG  
1139 (green). Nuclei were counterstained with DAPI (blue).

1140

1141 **Figure 4. N-glycosylation inhibition and cell surface expression of ACE2.**

1142 (A through D) HEK 293T cells were transiently transfected for 24 hrs with the  
1143 indicated FLAG-tagged ACE2 constructs. Where stated, transfected cells were  
1144 incubated with either TM (1  $\mu$ g/ml) or KIF (5  $\mu$ g/ml) for 16 h before biotin  
1145 labelling. Cells were treated with (+) or without (-) biotin to label surface protein  
1146 for 1 h at 4°C. After neutravidin agarose pull-down, proteins were  
1147 immunoblotted with anti-FLAG antibody. GAPDH was used as the control to  
1148 assess the purity of biotinylated plasma membrane fractions. Similar results  
1149 were obtained in three independent experiments and a representative  
1150 experiment is shown.

1151

1152 **Figure 5. ACE2 Carboxypeptidase activity in the absence of glycosylation.**

1153 (A) Plot showing the results of carboxypeptidase assays using the indicated  
1154 immunoprecipitated FLAG-tagged ACE2 variants. A representative western  
1155 blot with an anti-FLAG antibody that detects immunoprecipitated ACE2 variants  
1156 is shown on the right. (B) the same as (A), but showing the results of  
1157 carboxypeptidase assays using the immunoprecipitated FLAG-tagged hACE2\*  
1158 mutant. A representative western blot with an anti-FLAG antibody that detects  
1159 immunoprecipitated hACE2 variants is shown on the right. Experiments were  
1160 performed in triplicates and standard deviation is shown.

1161

1162 **Figure 6. Co-immunoprecipitation assays and colocalization experiments**  
1163 **to analyze ACE2-Spike interactions.**

1164 (A) HEK 293T cells were independently transfected with vectors expressing  
1165 the indicated FLAG-tagged hACE2 or pACE2 proteins. Other cells were  
1166 transfected with a S-expressing vector. Cells expressing ACE2 variants or S  
1167 protein were lysed at 24h post-transfection. The cell lysates were mixed in a  
1168 1:1 ratio, and incubated with anti-FLAG beads. To control for background  
1169 binding of S protein to anti-FLAG beads, we performed similar experiments with  
1170 HEK293T cells that were independently transfected with a S-expressing  
1171 plasmid or an empty pCDNA3.1 vector. The amount of untagged and FLAG-  
1172 tagged proteins in the lysates (Input) and immunoprecipitates (IP) was  
1173 analyzed by Western blotting with anti-S and anti-FLAG antibodies. WB,  
1174 Western blot; IP, Immunoprecipitation. Similar results were obtained in three  
1175 independent experiments and representative data is shown. (B) Cellular co-  
1176 localization of ACE2 variants and S protein. Cells were co-transfected with  
1177 ACE2-expressing plasmids and a S-expressing vector. After 24 h, cells were  
1178 fixed and immunostained using anti-FLAG antibody followed by Alexa 488-  
1179 conjugated goat anti-rabbit IgG (green). The S protein was visualized using  
1180 anti-S monoclonal antibody, followed by Alexa 594-goat anti-mouse IgG (red).  
1181 Nuclei were counterstained with DAPI (blue). Similar results were obtained in  
1182 three separate experiments and representative data is shown.

1183

1184 **Figure 7. Role N-glycosylation in ACE2/S colocalization and binding**

1185 (A through C) The same Western blot and immunoprecipitation experiments in  
1186 Fig. 6A were repeated, but in the presence of TM (1 ug/ml). Cells were lysed

1187 24 h after transfection. (D) 293T cells were transfected with a plasmid  
1188 expressing SARS-CoV-2 S protein and treated with TM (1 µg/ml). 16 h post-  
1189 treatment, the S protein was precipitated by using ACE2 as a bait (lane 3), as  
1190 indicated in Figure 6. Cell lysates were also digested with PNGase F (lane 2).  
1191 All the samples were analyzed by Western blotting using anti-S monoclonal  
1192 antibody. (E) same (C), but both S and ACE2 protein were deglycosylated. (F  
1193 and G) Cells were co-transfected with ACE2-expressing plasmids and a S-  
1194 expressing vector. Cells were either untreated (+DMSO) or incubated with TM  
1195 (1µg/ml) (+TM) dissolved in DMSO for 16h. All cells were fixed and  
1196 immunostained using anti-FLAG antibody and then with Alexa 488-goat anti-  
1197 rabbit IgG (green). S protein was visualized by immunostaining it with anti-S  
1198 monoclonal antibody, followed by Alexa 594-goat anti-mouse IgG (red). Nuclei  
1199 were counterstained with DAPI (blue). Similar results were obtained in three  
1200 separate experiments and representative data is shown.

1201

1202 **Figure 8. Effect of hACE2 N-glycosylation on SARS-CoV S and SARS-**  
1203 **CoV-2 S protein fusion activity**

1204 (A) HEK 293T effector cells were co-transfected with a GFP-expressing  
1205 plasmid along with one of the following plasmids: a plasmid expressing SARS-  
1206 CoV-2 S protein, a plasmid expressing SARS-CoV S protein or an empty  
1207 pCDNA3.1 plasmid. At 24 h post transfection, cells were detached and co-  
1208 cultured with HEK293T target cells co-expressing either hACE2 or hACE2\* and  
1209 TMPRSS2 for 24 h. Target cells transfected with an empty plasmid were  
1210 included as negative control. Representative results are shown. A Western blot  
1211 showing expression of hACE2 and hACE2\* proteins is shown on the right.

1212 GAPDH was used as a loading control. (B) Quantitative representation of  
1213 syncytia shown in (A). Values are means  $\pm$  SD from one representative  
1214 experiment performed in triplicate. \*\*\* $p < 0.0005$  (as determined by two-tailed  
1215 Student's t-test) with respect to the negative controls and hACE2\*. NS, not  
1216 significant.

1217

1218 **Figure 9. Contribution of ACE2 N-glycosylation to viral entry of SARS-**  
1219 **CoV/SARS-CoV-2 S pseudotyped viruses.**

1220 (A) HEK293T cells were transiently transfected with plasmids expressing  
1221 hACE2 or hACE2\* proteins, and their expression levels were analyzed by  
1222 Western blotting using anti-FLAG and anti-GAPDH antibodies. (B)  
1223 Representative fluorescence images of HEK293T cells expressing wild-type  
1224 hACE2 or hACE2\* after infection with equalised amounts of GFP-expressing  
1225 SARS-CoV, SARS-CoV-2 or VSVG pseudotyped viruses. (C) The percentage  
1226 of GFP-positive cells was measured at 72h post-infection by FACS. Wild-type  
1227 VSV-G was used as a positive control. Values are means  $\pm$  SD from one  
1228 representative experiment performed in triplicate. \* $p < 0.05$ ; \*\* $p < 0.005$ ; \*\*\* $p$   
1229  $< 0.0005$  (as determined by two-tailed Student's t-test) with respect to wild-type  
1230 hACE2 and Mock cells. NS, not significant.

1231

1232

1233

**A**

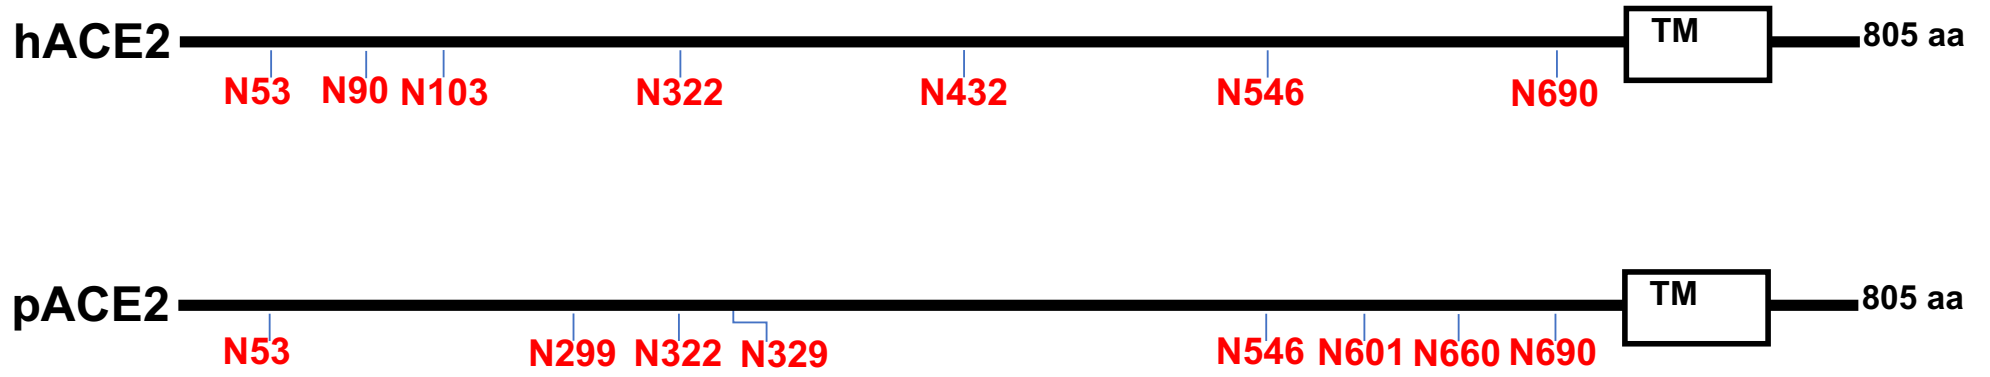

**Figure 1**

**B**

|                    | pCDNA3.1 | hACE2-FLAG | hACE2-FLAG | hACE2-FLAG |
|--------------------|----------|------------|------------|------------|
| TM (1 $\mu$ g/ml): | -        | -          | +          | -          |
| DMSO:              | +        | +          | -          | +          |
| PNGase F:          | -        | -          | -          | +          |

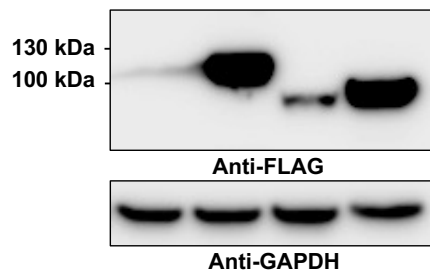**C**

|                    | pCDNA3.1 | pACE2-FLAG | pACE2-FLAG | pACE2-FLAG |
|--------------------|----------|------------|------------|------------|
| TM (1 $\mu$ g/ml): | -        | -          | +          | -          |
| DMSO:              | +        | +          | -          | +          |
| PNGase F:          | -        | -          | -          | +          |

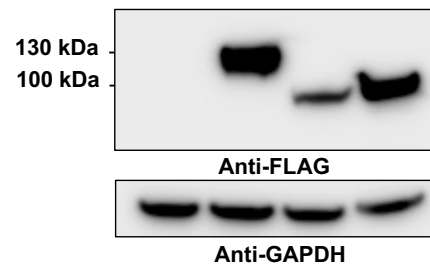**D**

|                    | hACE2-FLAG |    |    |    |        |
|--------------------|------------|----|----|----|--------|
|                    | pCDNA3.1   | WT | WT | WT | hACE2* |
| TM (1 $\mu$ g/ml): | -          | -  | +  | -  | -      |
| DMSO:              | +          | +  | -  | +  | +      |
| PNGase F:          | -          | -  | -  | +  | -      |

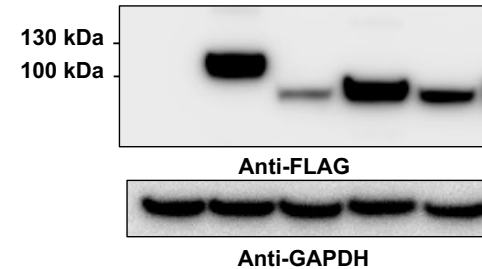**E**

|                     | hACE2-FLAG |    |    |    |    |
|---------------------|------------|----|----|----|----|
|                     | pCDNA3.1   | WT | WT | WT | WT |
| KIF (5 $\mu$ g/ml): | -          | -  | +  | -  | +  |
| Endo H:             | -          | -  | -  | +  | +  |

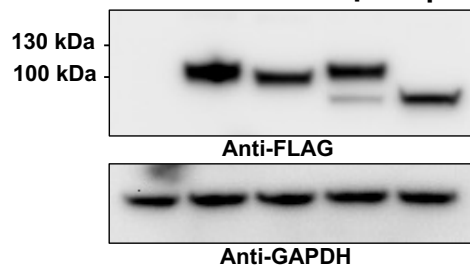**F**

|                     | pACE2-FLAG |    |    |    |    |
|---------------------|------------|----|----|----|----|
|                     | pCDNA3.1   | WT | WT | WT | WT |
| KIF (5 $\mu$ g/ml): | -          | -  | +  | -  | +  |
| Endo H:             | -          | -  | -  | +  | +  |

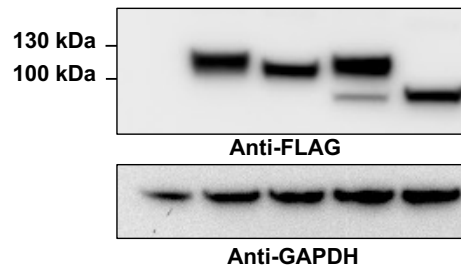**Figure 1**



**A**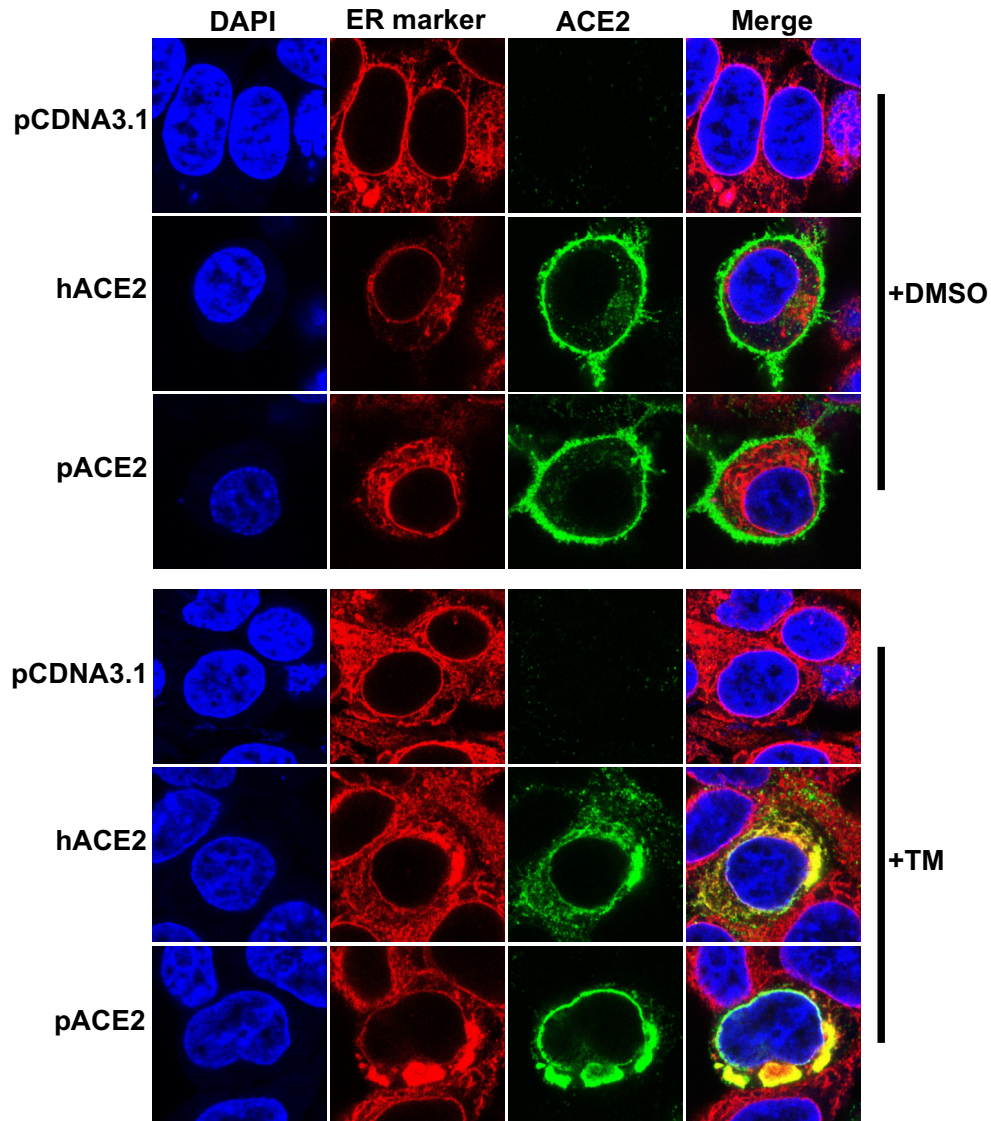**B**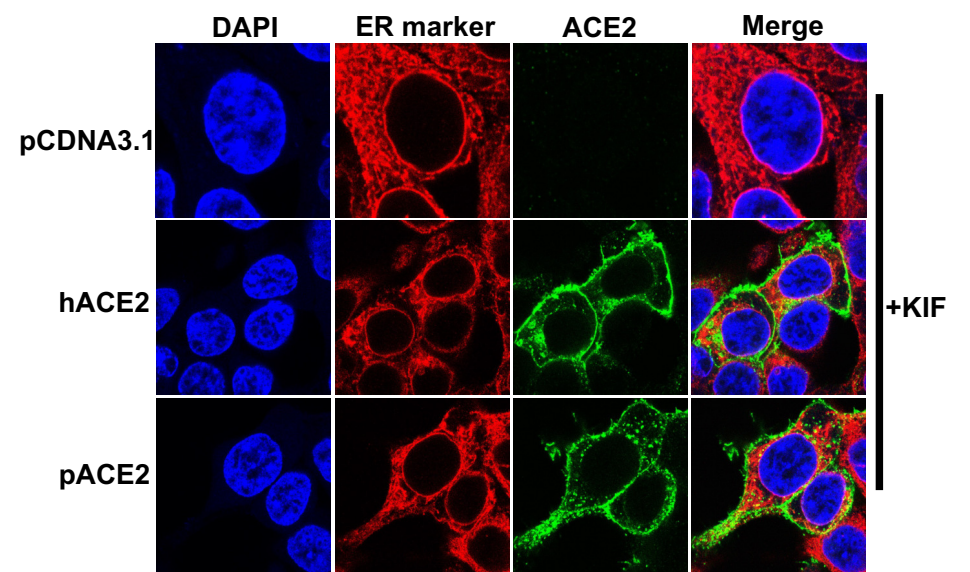**C**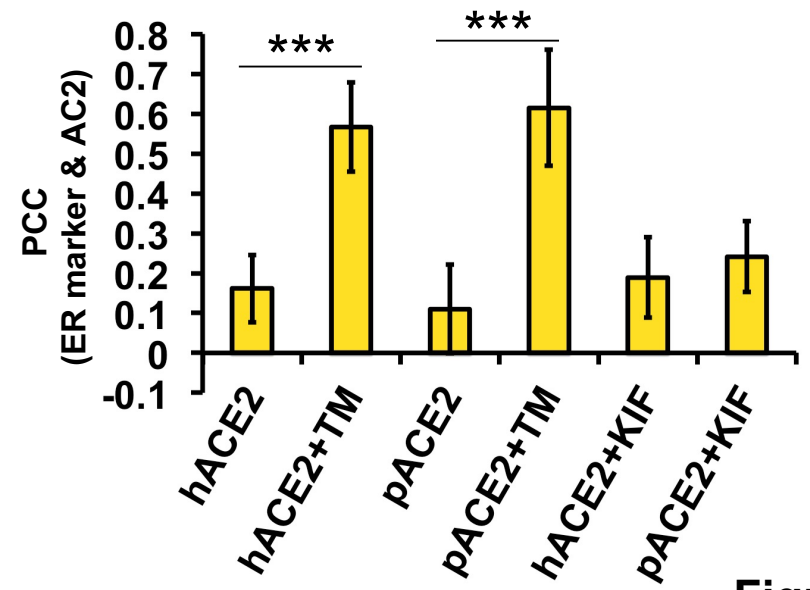**Figure 2**

**A**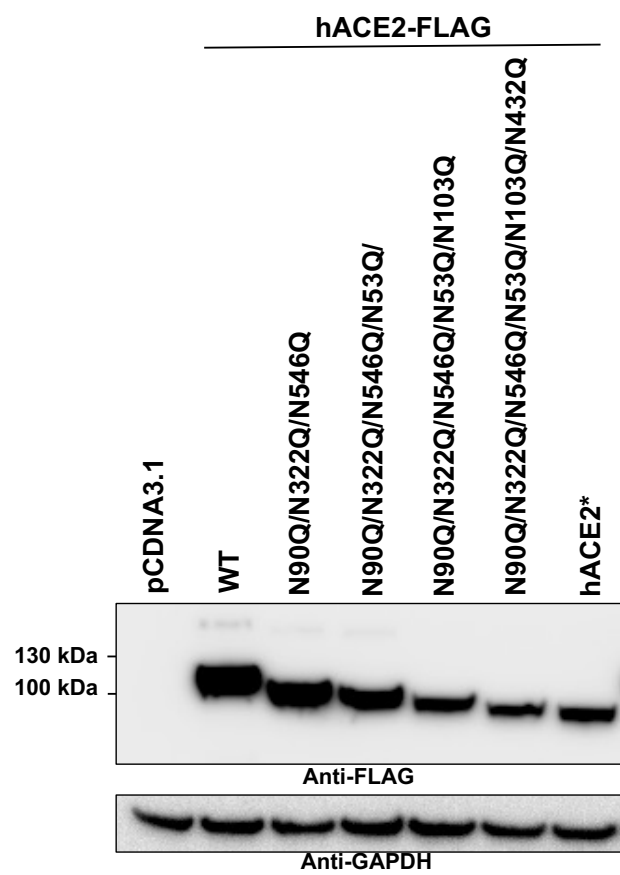**B**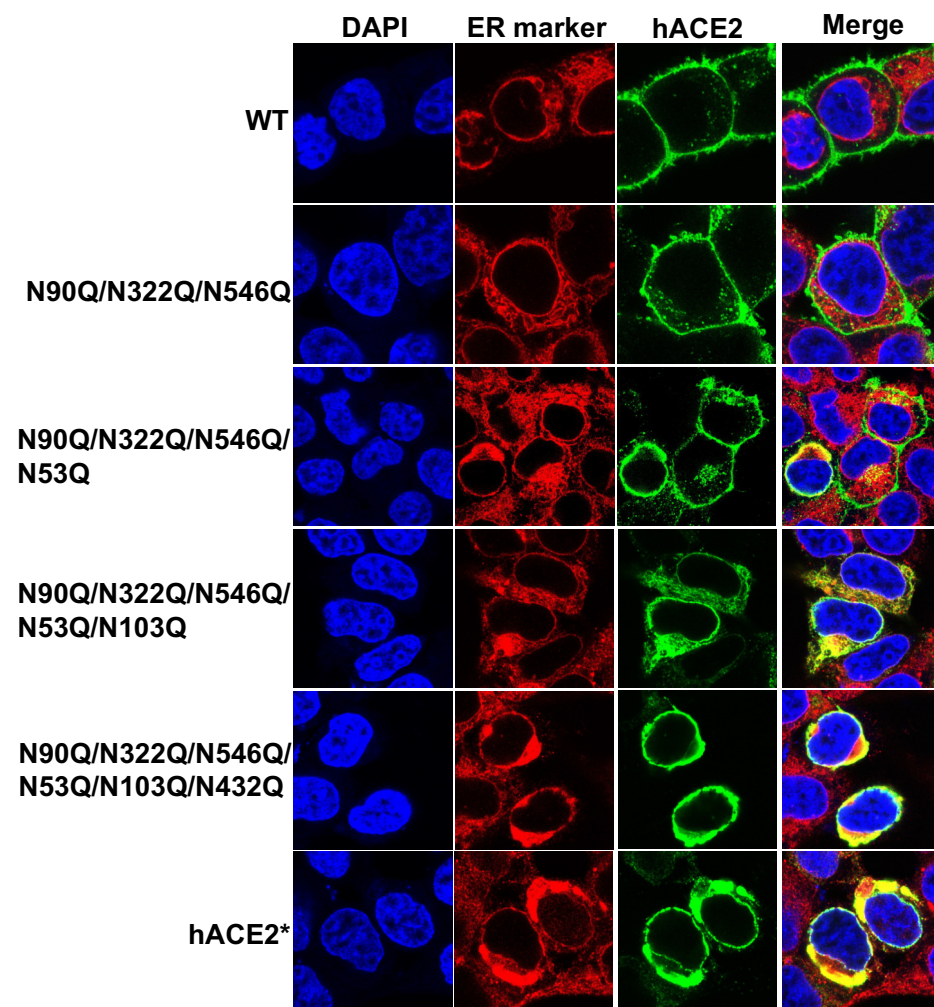**Figure 3**

**C**

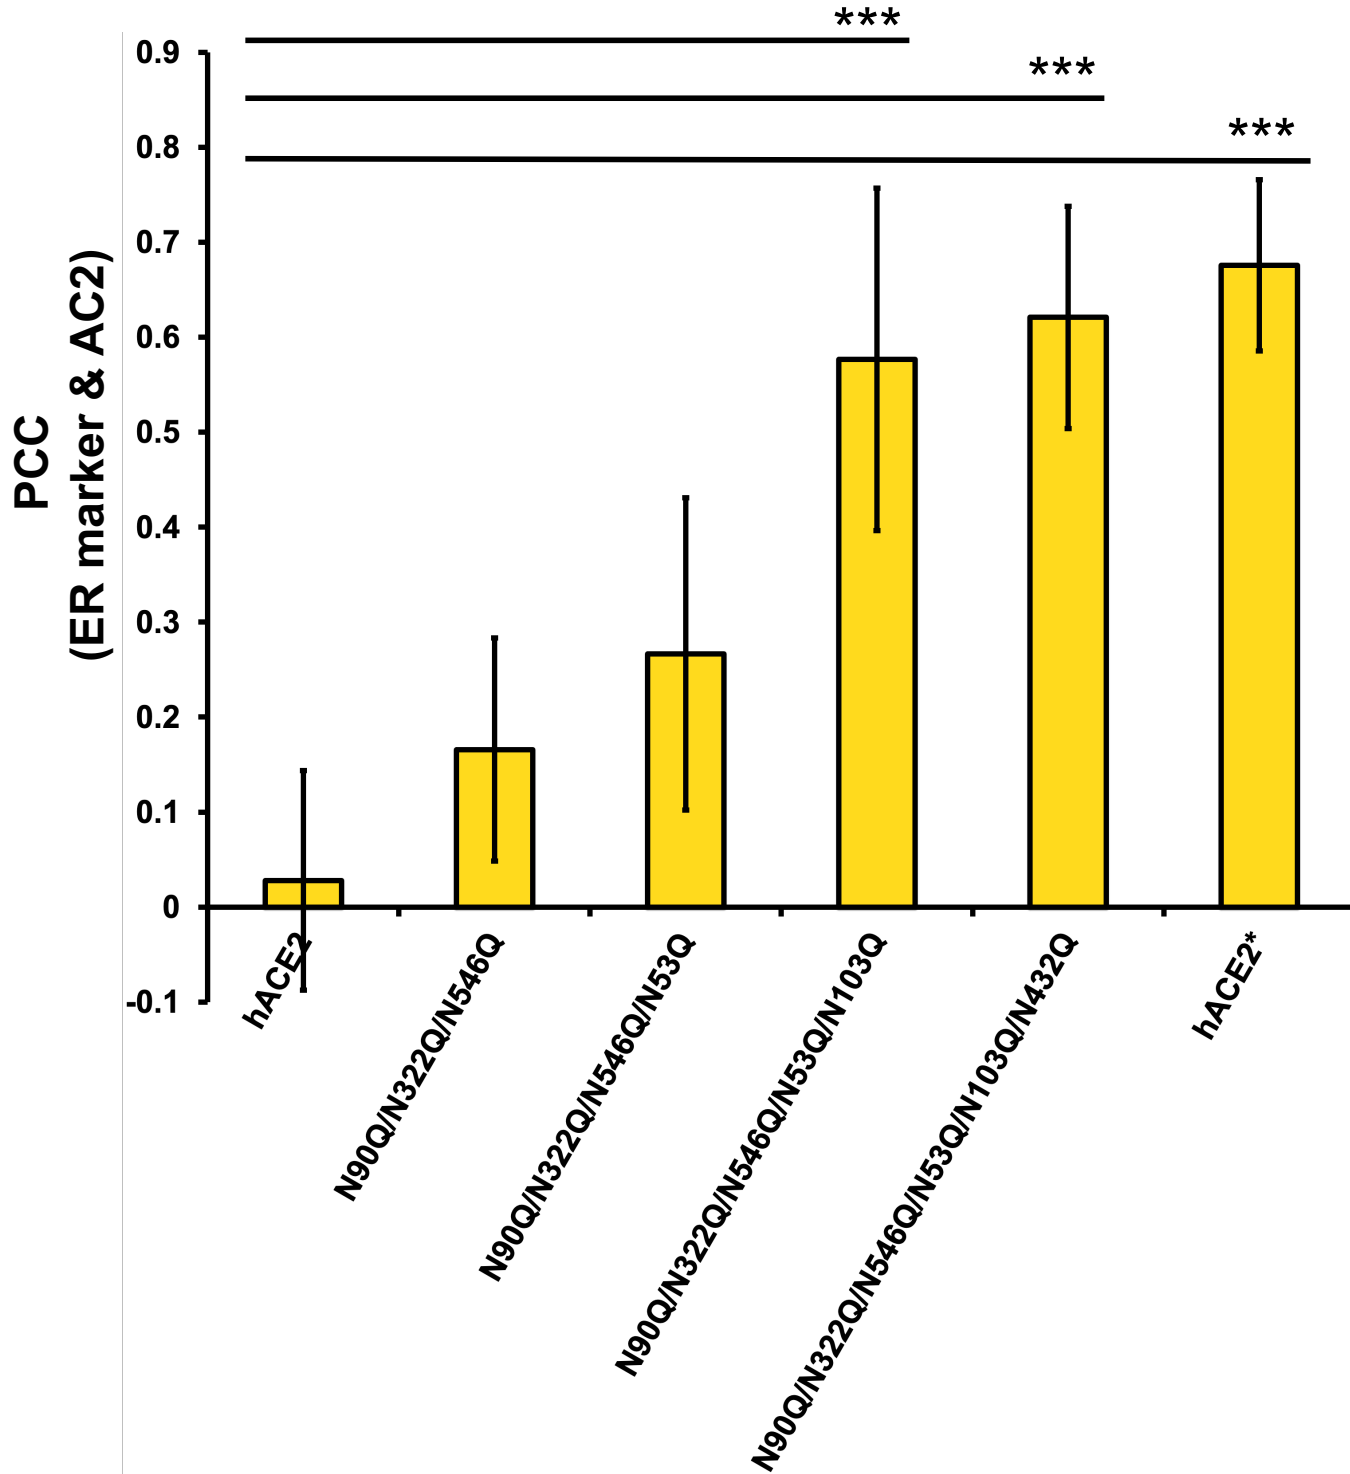

**Figure 3**



**D**

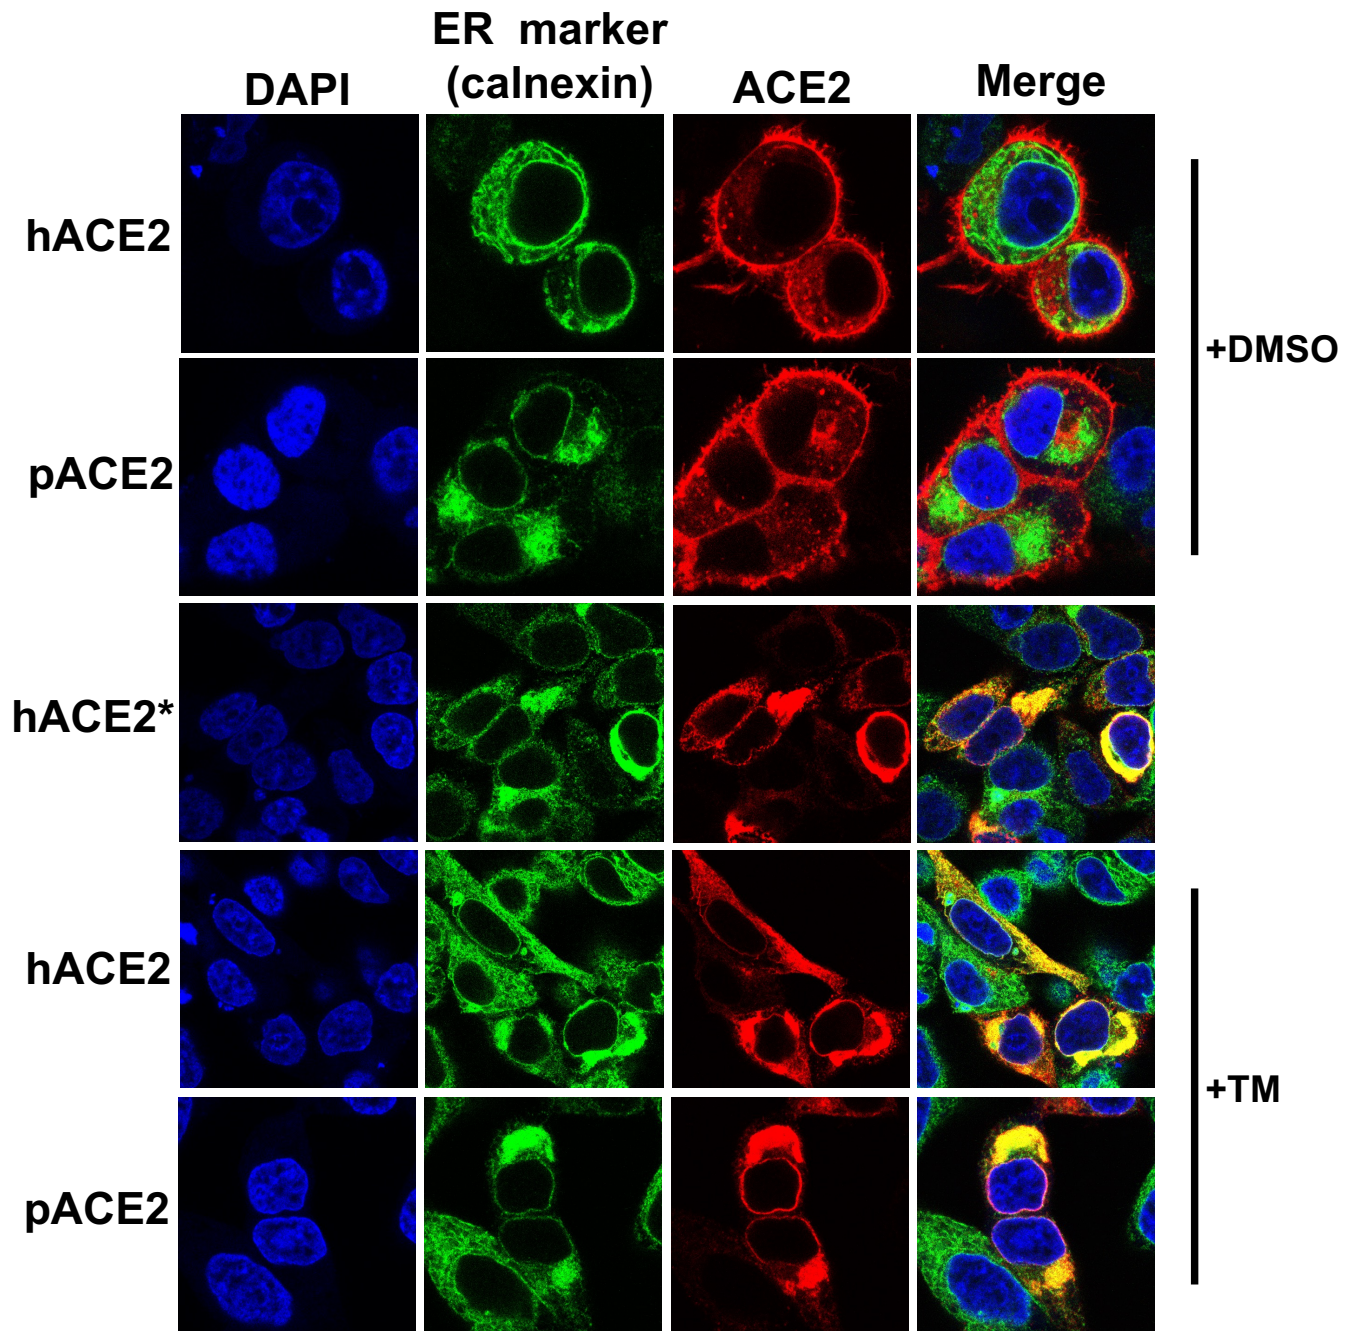

**Figure 3**

**A**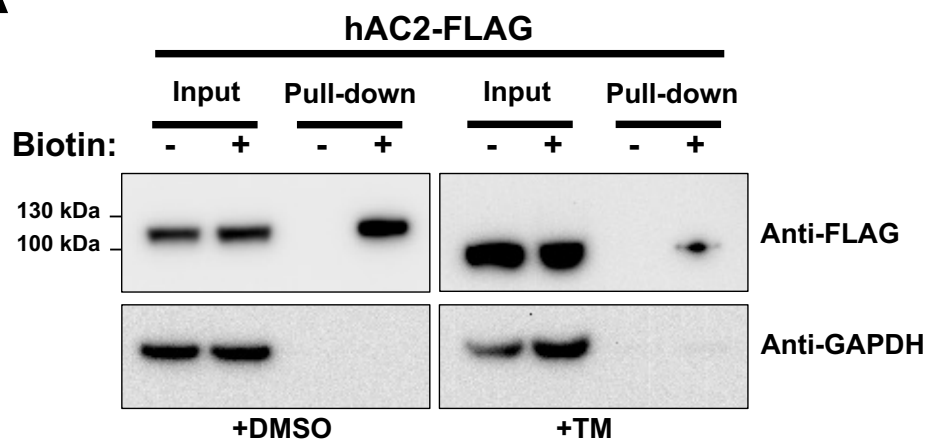**B**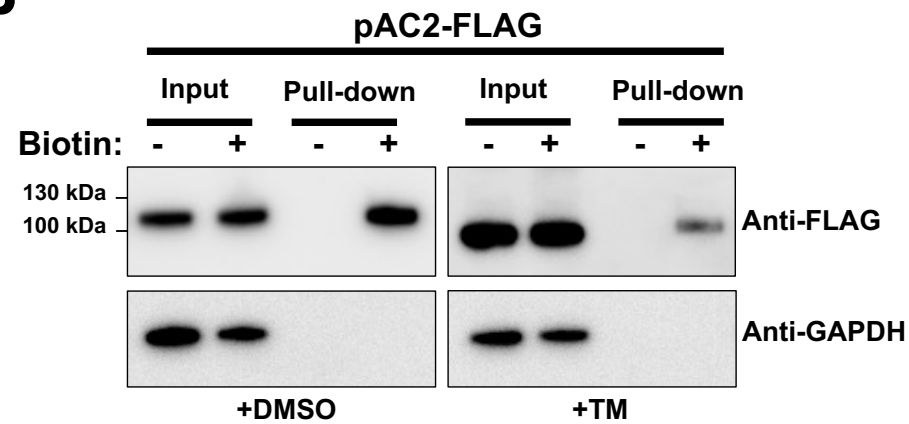**C**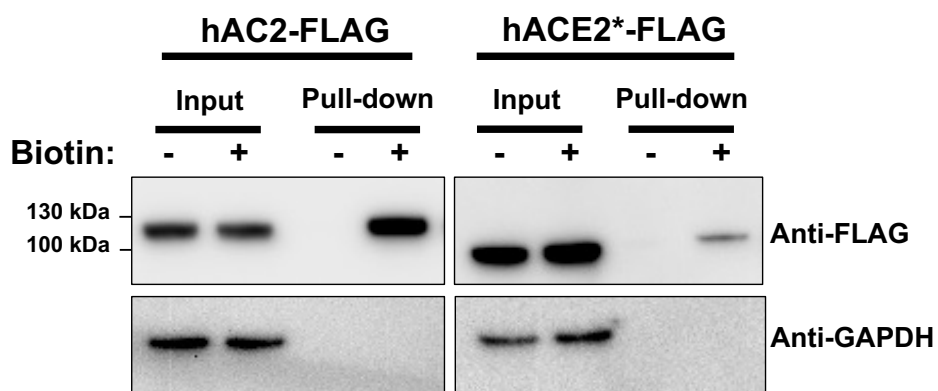**D**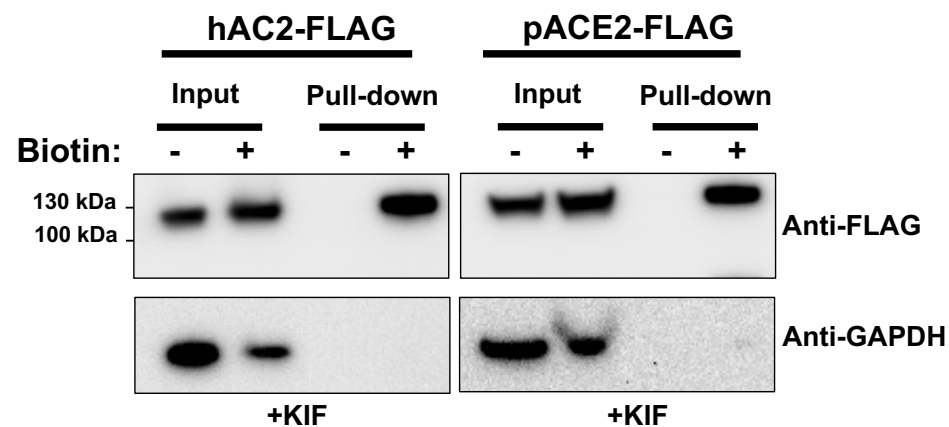**Figure 4**

**A**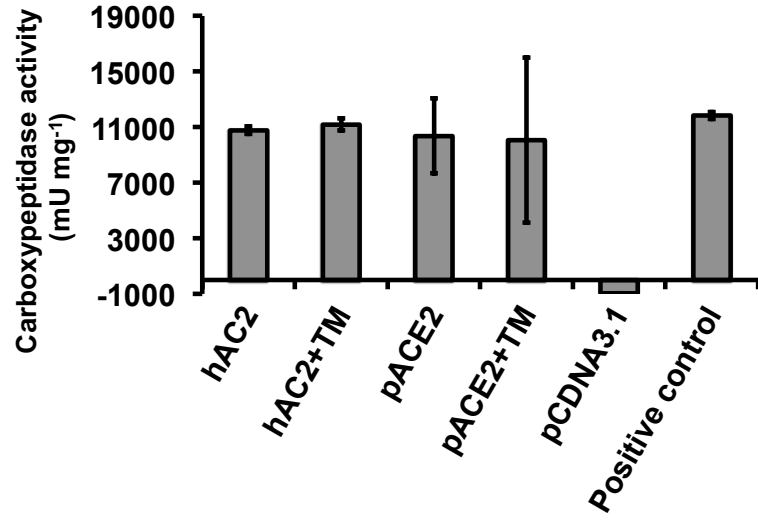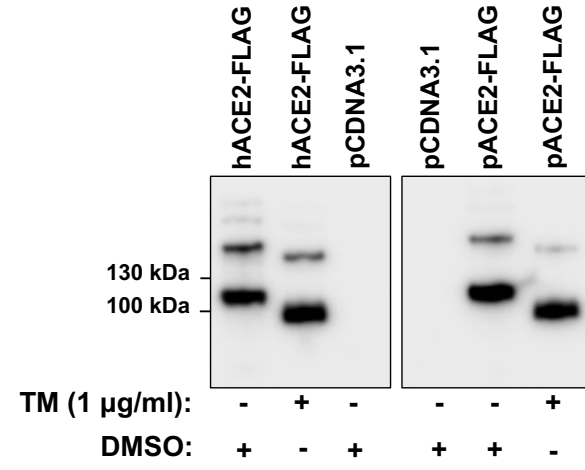**B**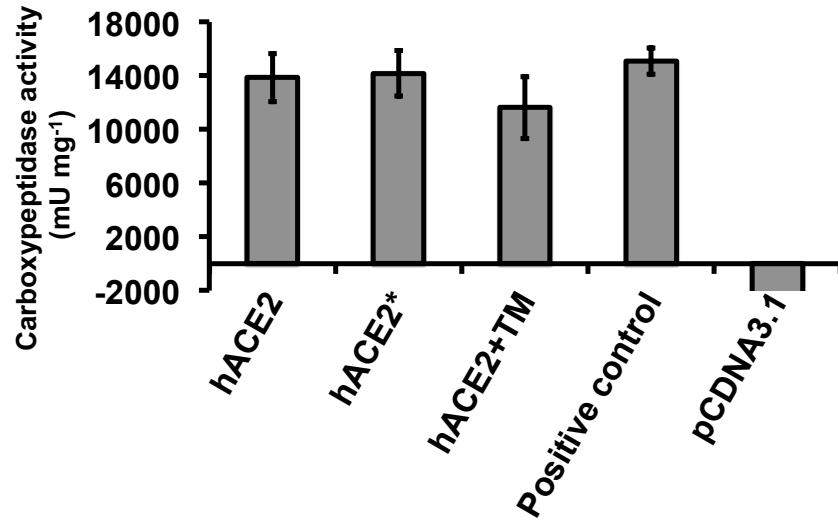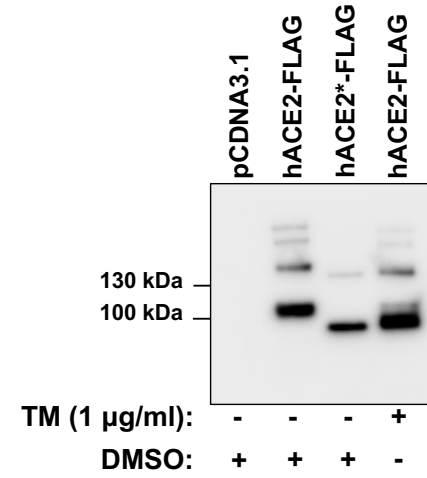**Figure 5**

**A**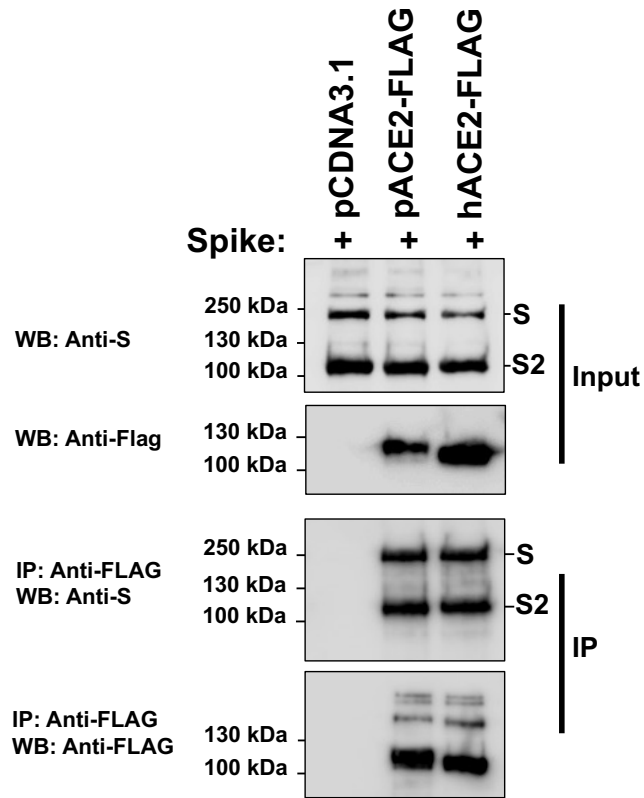**B**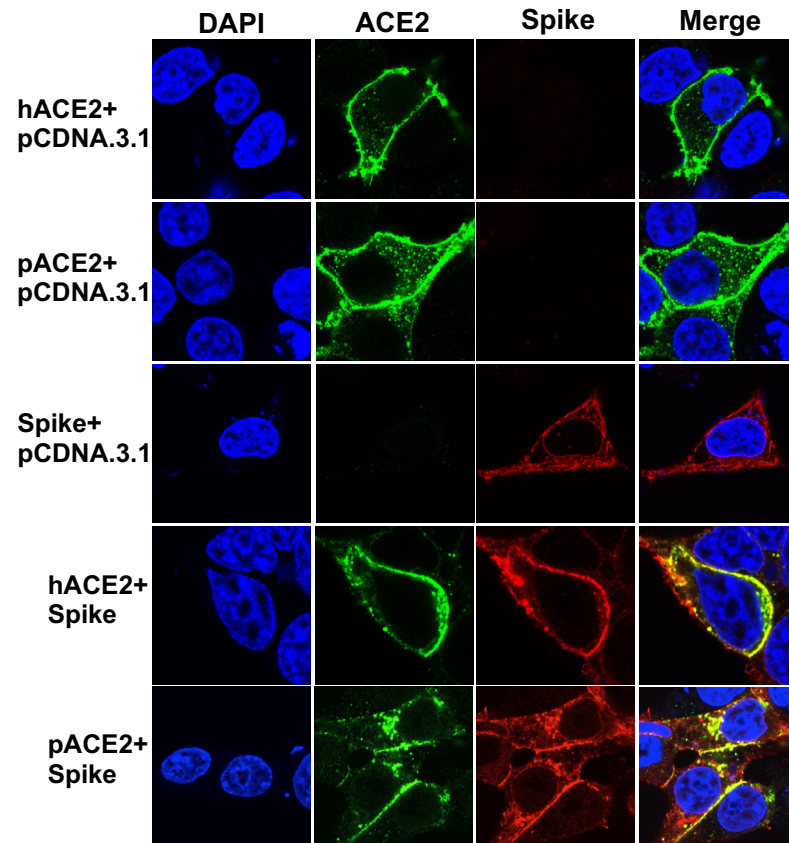**Figure 6**

**A**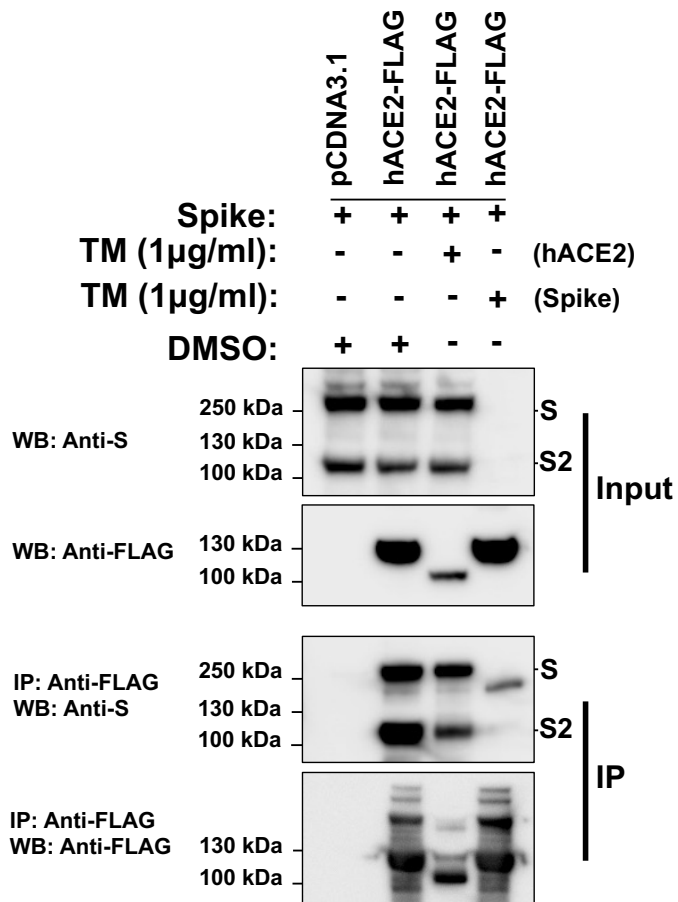**B**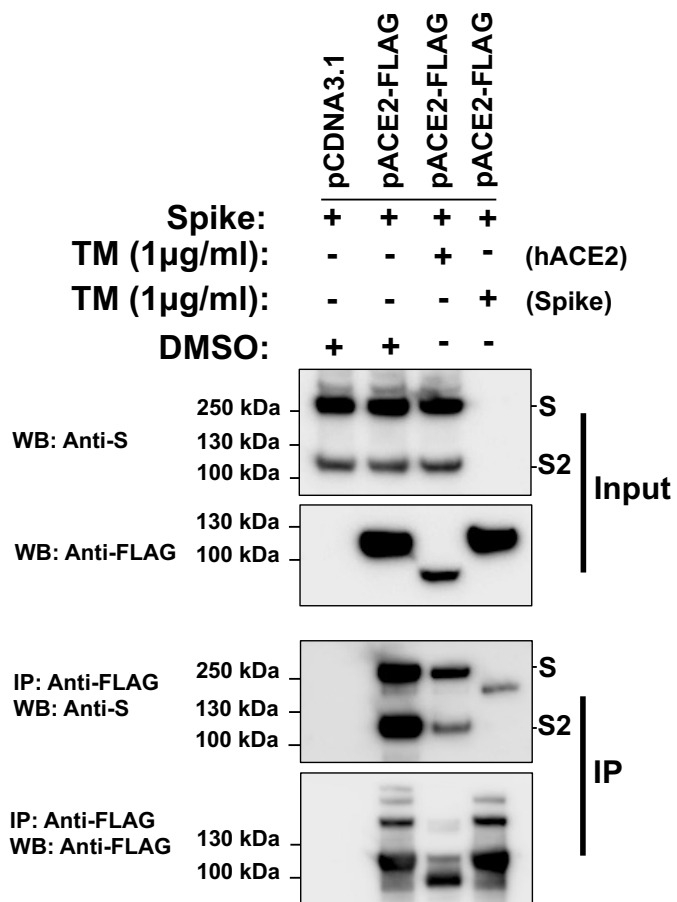**C**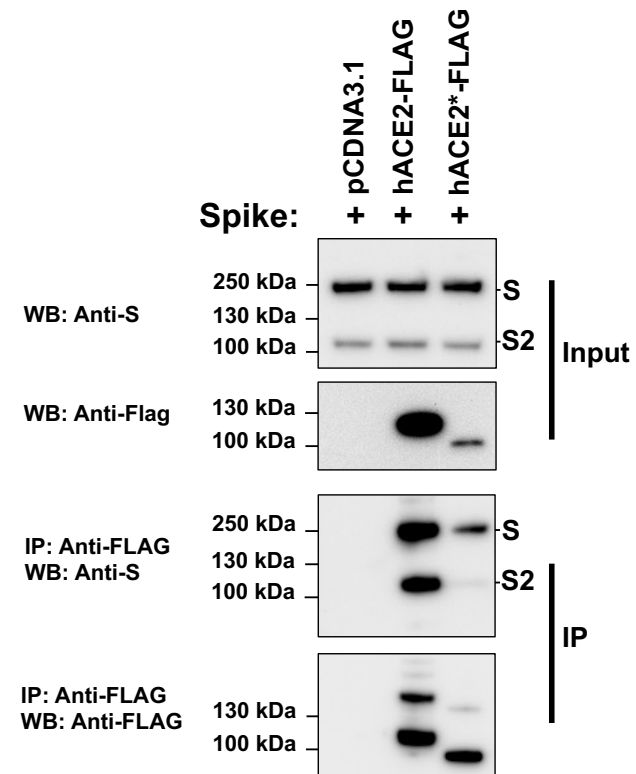**D**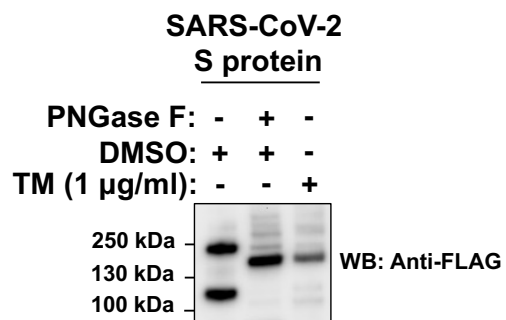**Figure 7**



**E**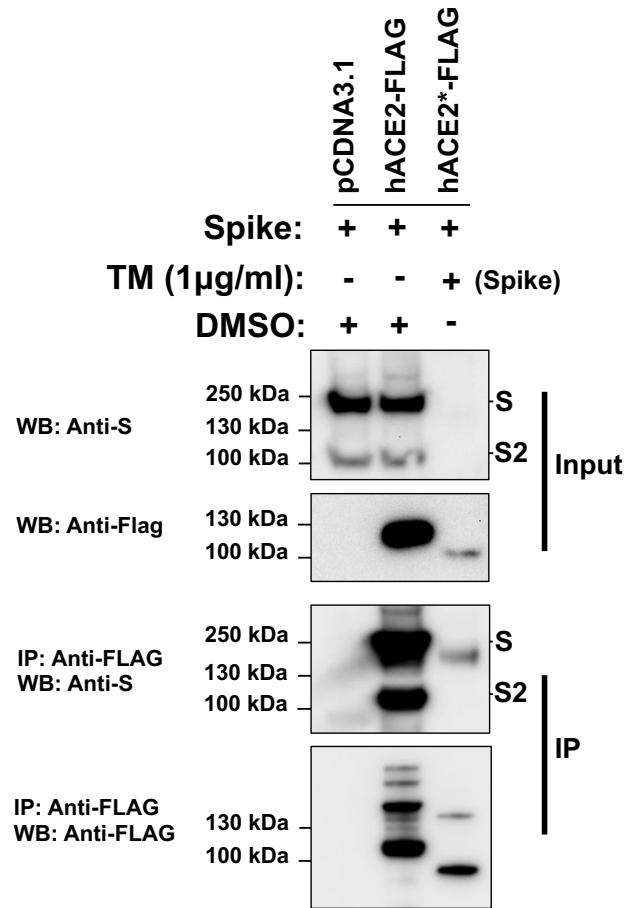**F**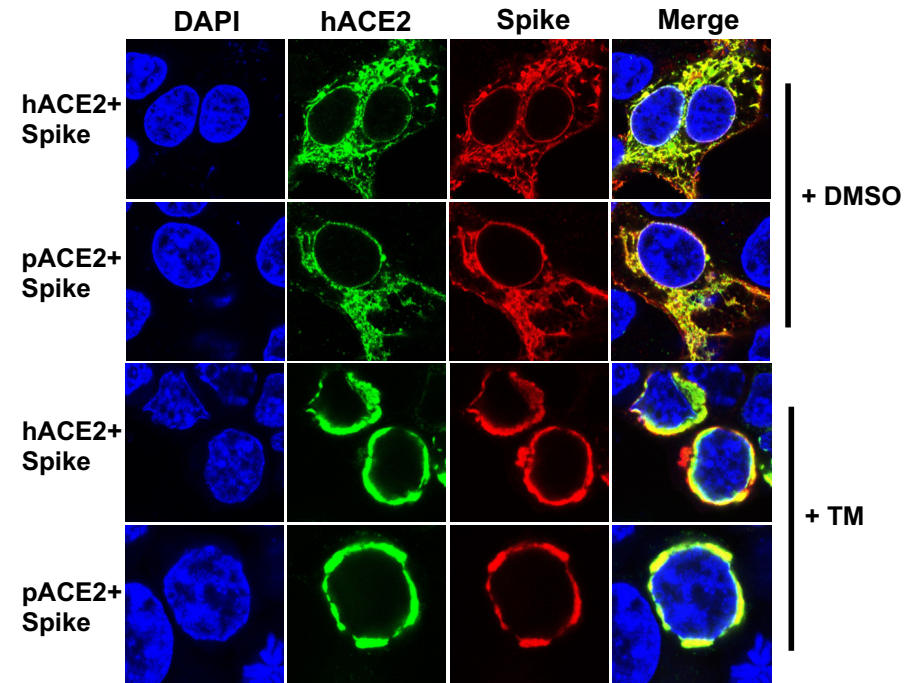**G**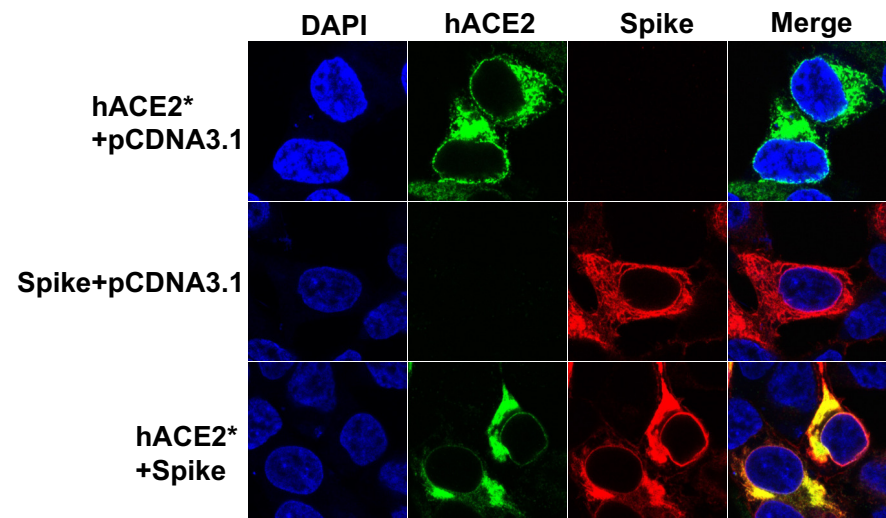**Figure 7**

**A**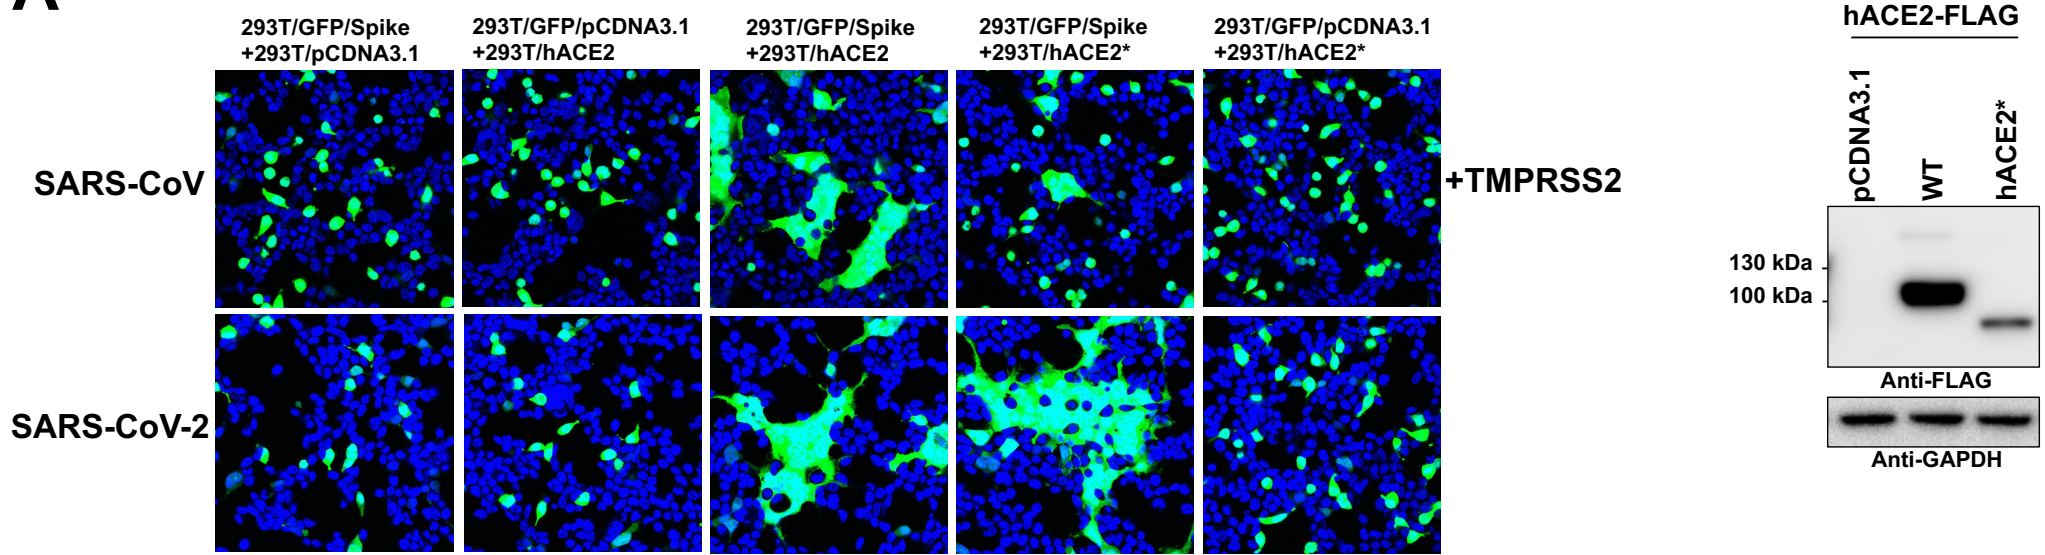**B**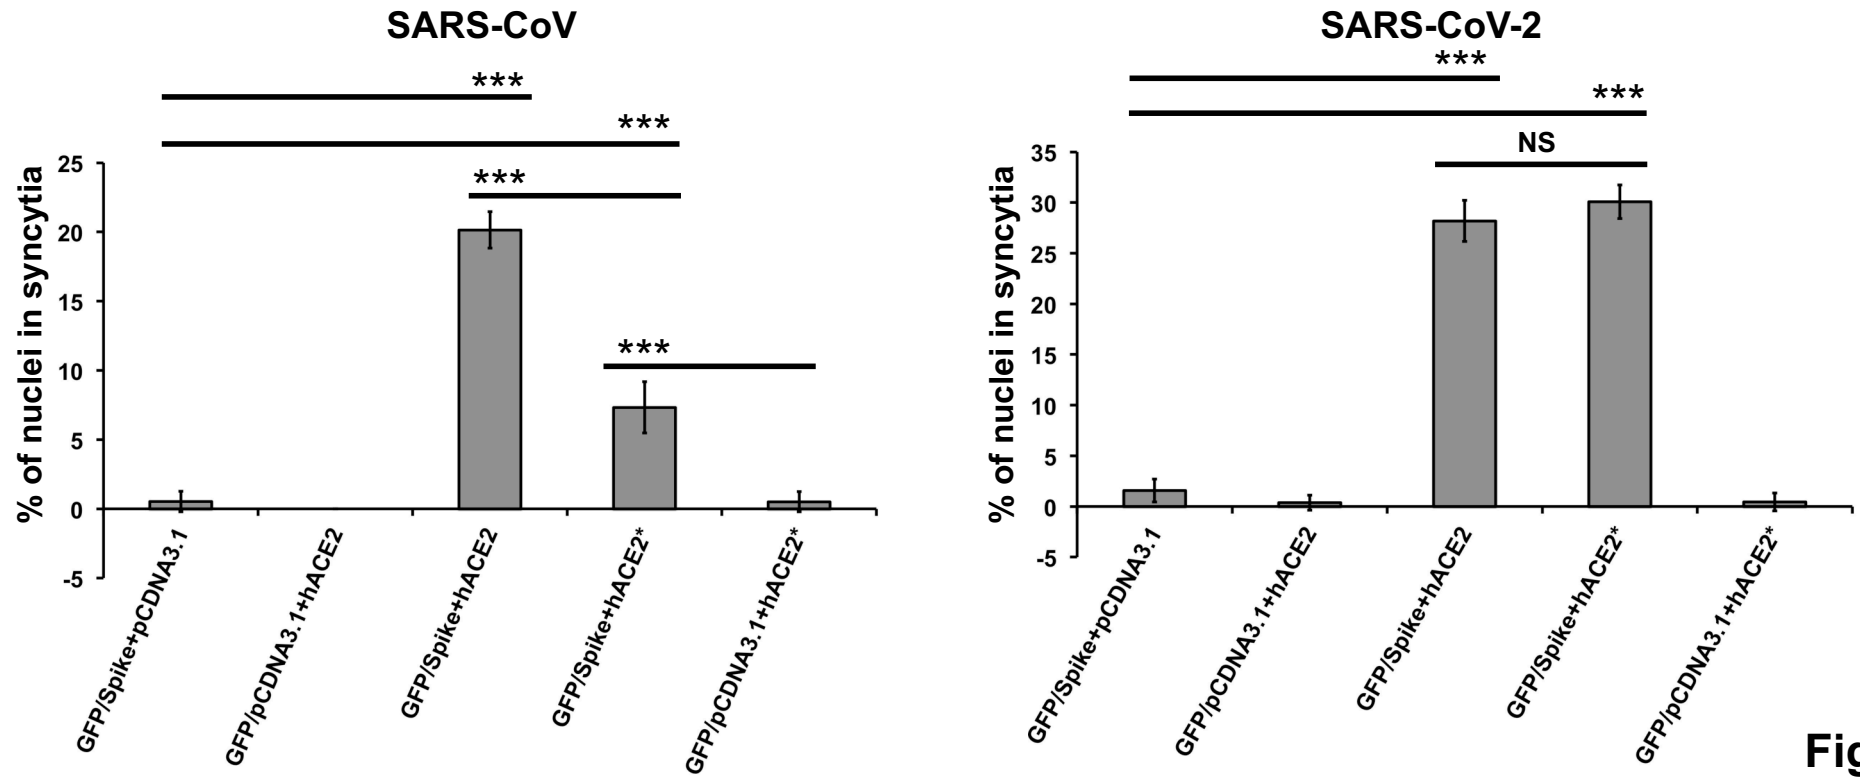**Figure 8**

**A**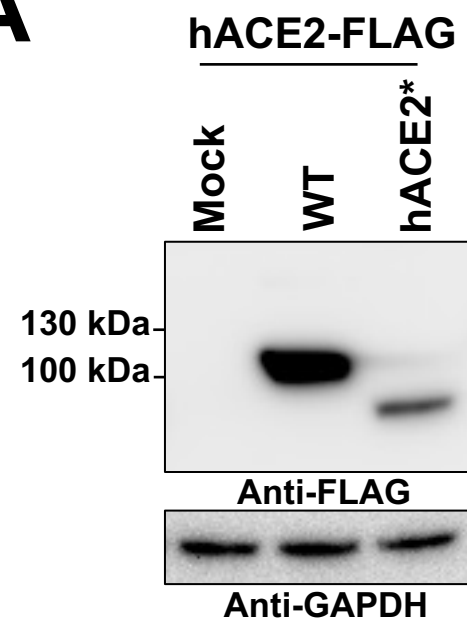**B**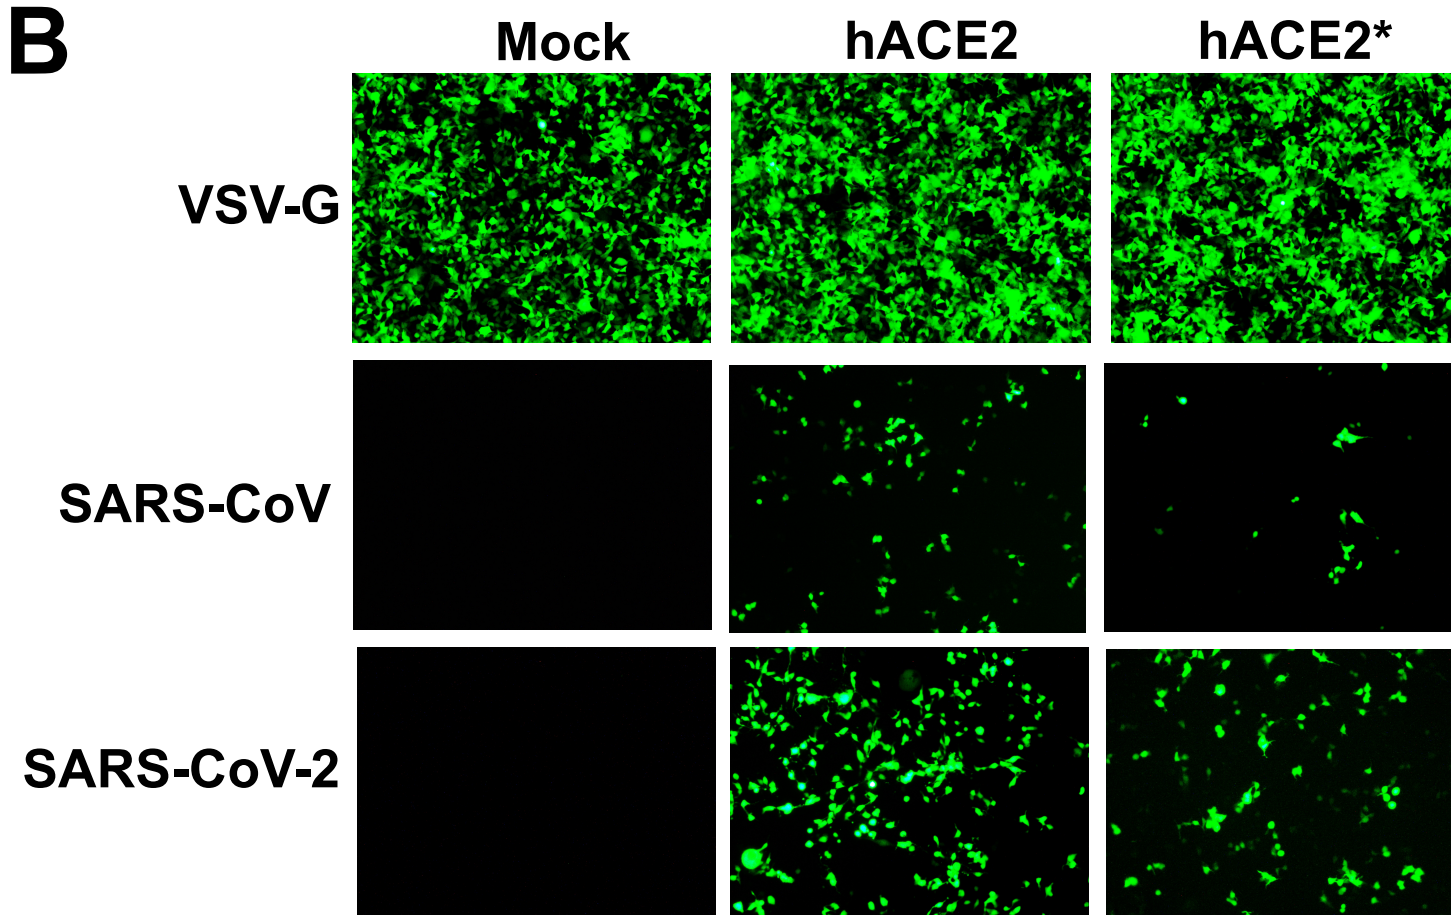**C**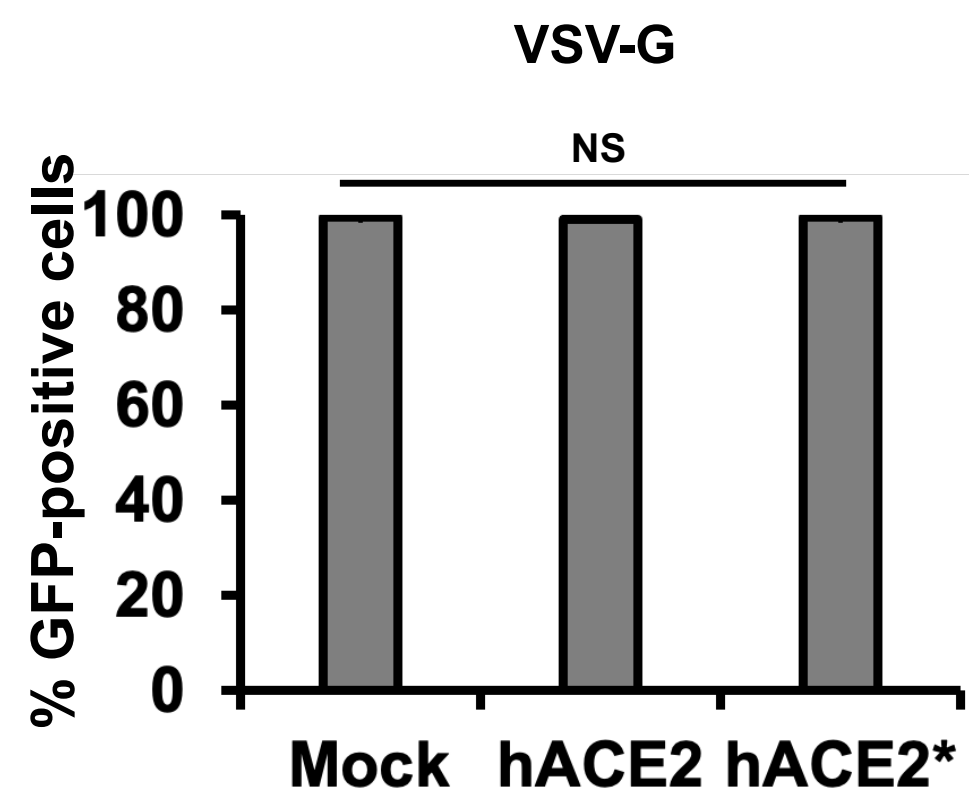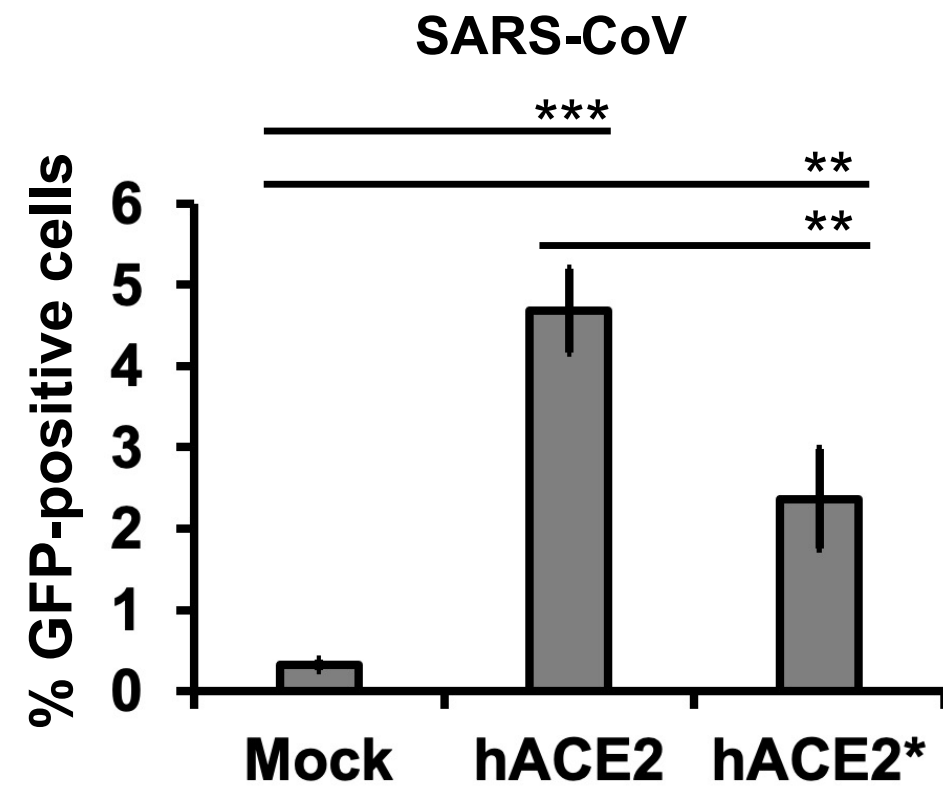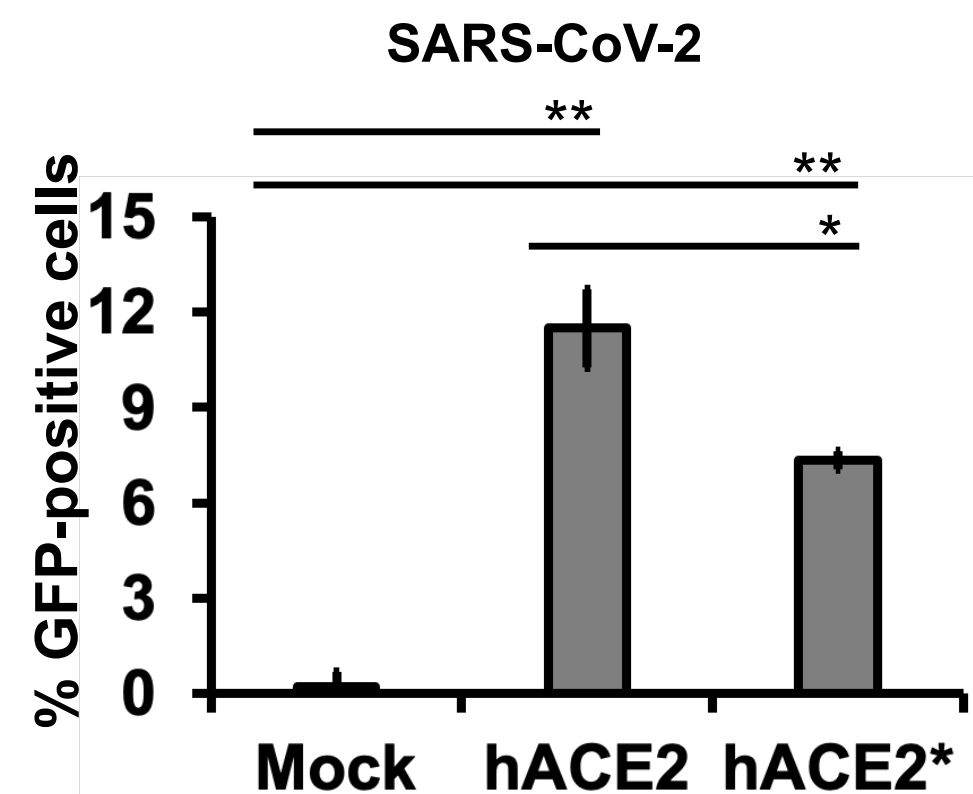**Figure 9**
